1     **Structure and Dynamics of HIV-1 Env Trimers on Native**  
2                   **Virions Engaged in Living T Cells**

3

4                   Irene Carlon-Andres<sup>1</sup>, Tomas Malinauskas<sup>1</sup>, Sergi Padilla-Parra<sup>1,2,3\*</sup>.

5     **Affiliations:**

6     <sup>1</sup>Division of Structural Biology, Wellcome Centre for Human Genetics, University of Oxford,  
7     Oxford OX3 7BN, UK

8     <sup>2</sup>Department of Infectious Diseases, King's College London, Faculty of Life Sciences &  
9     Medicine, London SE1 9RT, UK

10    <sup>3</sup>Randall Division of Cell and Molecular Biophysics, King's College London, London SE1  
11    9RT, UK.

12    \*Lead Contact: [sergio.padilla\\_parra@kcl.ac.uk](mailto:sergio.padilla_parra@kcl.ac.uk)

13

14

15

16 **Abstract**

17

18 The HIV-1 envelope glycoprotein (Env) mediates viral entry into the host cell. Although the  
19 highly dynamic nature of Env intramolecular conformations has been shown with single  
20 molecule spectroscopy in vitro, the bona fide Env intra- and intermolecular mechanics when  
21 engaged in live T cells remains unknown. We used both, two photon fast fluorescence  
22 lifetime imaging detection of single-molecule Förster Resonance Energy Transfer and single  
23 molecule photobleaching to reveal transitions between intramolecular and intermolecular  
24 conformations that mediate Env clustering. Furthermore, we show that three broad  
25 neutralizing anti-Env antibodies directed to different epitopes destabilise Env intramolecular  
26 dynamics and their clusters when engaged to living T cells. Importantly, our results show that  
27 Env clustering is a common conformation across different HIV-1 Env strains, which depends  
28 on efficient virus maturation, and that is disrupted upon binding of Env to CD4 or to  
29 neutralizing antibodies. Thus, this study illuminates how different intramolecular  
30 conformations and clusters of Env mediate HIV-1 Env–T cell interactions in real time and  
31 therefore might control immune evasion.

32

33

34 **Introduction**

35

36 HIV-1 entry into the cell requires fusion of the viral lipidic envelope with the host plasma  
37 membrane. This process is mediated by the HIV-1 Env glycoprotein, consisting of a  
38 homotrimer of gp120-gp41 heterodimers<sup>1</sup>, which is found in low density per virion (7–14  
39 spikes per particle)<sup>2-4</sup>. The interaction between HIV-1 Env and host receptor CD4 triggers a  
40 series of conformational changes allowing the co-receptor, either CCR5 or CXCR4, to bind  
41 to the prefusion complex<sup>5,6</sup>. We have previously determined the time-resolved stoichiometry  
42 of the prefusion complex in live cells<sup>5</sup>. This prefusion complex assembled via a common  
43 three-step mechanism in which one or two Env protomers were engaged in the prefusion  
44 complex. The current hypothesis for Env intramolecular dynamics HIV-1 Env would undergo  
45 three states during this process: first, Env adopts a closed conformation (named State 1) right  
46 before CD4 asymmetric interaction; second, after CD4 engagement, Env adopts an  
47 intermediate state (State 2) followed by a last open conformation for the coreceptor  
48 engagement (State 3) that exposes otherwise hidden, more conserved epitopes, increasing  
49 susceptibility for antibody recognition<sup>7-9</sup>.

50 The intramolecular structure and dynamics of the HIV-1 Env has been extensively studied  
51 during the past few years<sup>8-11</sup>. Munro et al.,<sup>9</sup> pioneered *in vitro* intramolecular structural and  
52 dynamic studies of HIV Env trimers in native virions utilizing single molecule Förster  
53 Resonance Energy Transfer (FRET) and described three different intramolecular  
54 conformational states of Env. It is currently unclear how these three different states can be  
55 reconciled with Env diffusion<sup>3</sup> and intermolecular dynamics<sup>12</sup> during cluster formation and  
56 dissociation in mature HIV-1 viruses and its relation with the prefusion reaction on the  
57 surface of the host. Moreover, it is still not clear whether these three intramolecular states  
58 described *in vitro* recapitulate the bona fide dynamics of HIV-1 Env when engaged in live T  
59 cells, in the presence or absence of broadly neutralizing antibodies.

60 In this study, we were able to detect intramolecular conformational states of Env, also  
61 described before<sup>9</sup>, and to determine how they relate to intermolecular Env cluster  
62 conformations during the first steps of the HIV-1 prefusion reaction in living T cells. We also  
63 describe the role of Env clusters when exposed to inhibiting concentrations of broadly  
64 neutralizing antibodies.

65

66 **Results**

67

## 68 **Structural Characterization of HIV-1 virions by two photon FRET-FLIM**

69

70 Aiming to ascertain both intramolecular and intermolecular Env dynamics with a  
71 multiparameter FRET and fluorescence lifetime microscopy (FLIM) approach, we produced  
72 HIV-1 virions labelled with a variant of super-folding GFP (GFP<sub>OPT</sub>) in the V4 loop of gp120  
73 HXB2 Env glycoprotein (Fig. 1A-C)<sup>13</sup>. Importantly, it was previously shown that labelling  
74 the V4 loop of gp120 with GFP<sub>OPT</sub> does not significantly interfere with HIV-1 fusogenic  
75 activity<sup>14</sup>. HIV-1 virions pseudo-typed with HXB2 V4 -GFP<sub>OPT</sub> Env were exposed to  
76 monoclonal nanobodies against GFP, in turn, labelled with Atto 488 (NbA488) and Atto 594  
77 (NbA594), that constitute the donor and acceptor dipoles of the FRET pair, respectively (Fig.  
78 1C). This particular labelling strategy allows FRET to occur between donor and acceptor  
79 dipoles located in a single Env molecule (intramolecular interaction) and between adjacent  
80 Env molecules (intermolecular interaction), when fluorophores are in close enough proximity  
81 and in a proper orientation. To be certain of only considering bona fide HIV-1 virions and  
82 being able to determine their maturation state for subsequent FRET-FLIM analysis, pseudo-  
83 virions were produced harbouring the Gag polyprotein precursor fused to GFP (Fig. 1A-B).  
84 Virion labelling efficiency was determined by exposing HIV-1<sub>Gag-GFP HXB2 V4-GFP<sub>OPT</sub></sub> virions to  
85 NbA594 and quantifying the percentage of double positive (GFP+ NbA594+) particles,  
86 which was 32.7% of the total GFP+ particles (Fig. S1A). We also assessed the maturation  
87 efficiency of the viral sample by tracking the release of the internal envelope GFP after  
88 exposure to 0.01% concentration of saponin. Only mature HIV-1 particles that undergo  
89 proteolytic processing of Gag are able to release the GFP content after permeabilization of  
90 the viral membrane. We observed that 40% of virions were able to release the internal GFP  
91 against 0%, when virions were produced in presence of the HIV-1 protease inhibitor  
92 Saquinavir (SQV) (Fig. S1B). Double positive (GFP+ NbA594+) mature virions showed a  
93 drop in GFP fluorescence upon saponin treatment and a stable Atto594 fluorescence signal  
94 overtime (Fig. S1C, top panel), showing both, a low contribution of photons from the V4-  
95 GFP<sub>OPT</sub> Env compared to Gag-GFP, and a high stability of the Atto594 fluorophore, making  
96 this labelling suitable for our FRET-FLIM experiments. In contrast, immature virions  
97 (+SQV) did not show a drop in GFP fluorescence overtime but an increase in Atto594  
98 fluorescence intensity, suggesting an increased accessibility of the NbA594 to the  
99 unprocessed Gag-GFP after viral membrane permeabilization (Fig. S1C, bottom panel).

100 HIV-1<sub>Gag-GFP HXB2 V4-GFP<sub>OPT</sub></sub> virions in presence or absence of Nbs were imaged using two  
101 photon rapid FLIM<sup>15,16</sup> and both lifetime and apparent FRET efficiency were calculated and  
102 plotted into multi-parameter two-dimensional graphs<sup>17</sup>. The multidimensional analysis of  
103 correlated changes of FRET and FLIM allows to efficiently detect heterogeneities in a  
104 population even in low-photon conditions, where few labelled proteins are available<sup>18</sup>.  
105 Hence, this technique is able to separate the spectrally overlapped signals of GFP and Atto  
106 488 based on their different intrinsic lifetimes (1200±100 ps and 1800±50 ps, respectively)  
107 (Fig. S2A). Clearly, the addition of NbA488 induced a lifetime change in a large population  
108 of HIV-1 virions, independently of their maturation state (~80% of the HIV-1 virions  
109 presented lifetime values of ~1800 ps) (Fig. S2A-B). Therefore, we could efficiently  
110 discriminate HIV-1 particles labelled with NbA488 from NbA488-negative particles. In  
111 addition, the FRET efficiency profile of HIV-1 particles labelled only with the donor, Nb488,  
112 allowed us to define a no-FRET threshold for mature HIV-1<sub>Gag-GFP HXB2 V4-GFP<sub>OPT</sub></sub> particles ( $E_{app}$   
113 < 0.1; Fig. S2A, right panel) and for immature viral particles ( $E_{app}$  < 0.06; Fig. S2B, right  
114 panel).

115 To define the heterogenous Env conformational landscape by FRET-FLIM, we exposed HIV-  
116 1<sub>Gag-GFP HXB2 V4-GFP<sub>OPT</sub></sub> particles to both, NbA488 and NbA594. If FRET would occur between  
117 Env V4 labels (NbA488 and NbA594), the fluorescence lifetime of NbA488 in the presence  
118 of NbA594 would be shortened or quenched and the apparent FRET efficiency would be  
119 increased<sup>19,20</sup>. As expected, addition of both, donor and acceptor fluorophores (NbA488 and  
120 NbA594, respectively) induced a shift towards positive  $E_{app}$  values ( $E_{app}$  > 0.1), which  
121 correlated with decreasing lifetime values (Fig. 1D, left panel). Here, we could detect three  
122 main FRET regimes: i) low or no FRET ( $E_{app}$  < 0.12) and higher lifetimes (~1900 ps) ii) a  
123 more dense population showing intermediate FRET efficiency (0.12 <  $E_{app}$  < 0.23) and  
124 moderately decreased lifetimes (~1750 ps), and iii) high apparent FRET efficiency ( $E_{app}$  >  
125 0.23) and decreased lifetimes (~ 1700 ps).

126 Seeking to relate the observed FRET-FLIM profile with intramolecular conformations of  
127 HIV-1 Env in our functional virions, we exposed mature HIV-1<sub>Gag-GFP HXB2 V4-GFP<sub>OPT</sub></sub> particles,  
128 to saturating concentrations (10 µg/mL) of soluble CD4 (sCD4<sub>D1-D4</sub>) (Fig. 1D, right panel).  
129 We could readily stabilize a low or no-FRET situation ( $E_{app}$  < 0.12) that we could assign to  
130 an Env open conformation (Fig. 1D, right panel) as seen by others<sup>21</sup>, whereas the  
131 intermediate and the high FRET regime populations were clearly reduced. This result  
132 suggests that intermediate (0.12 <  $E_{app}$  < 0.23) and high FRET regimes ( $E_{app}$  > 0.23) could

133 relate to an intramolecular closed Env conformation or intermolecular Env interactions, in  
134 which the conditions for FRET to occur would be more favourable.

135 It has been previously shown that in immature HIV-1 viruses, Env diffuses twice as slow ( $D$   
136  $= 0.001 \mu\text{m}^2/\text{sec}$ ) as compared to mature HIV-1 particles ( $D = 0.002 \mu\text{m}^2/\text{sec}$ )<sup>3</sup>. Moreover, in  
137 immature HIV-1 virions, Env is unable to form clusters<sup>12</sup>. Based on these observations and  
138 to accurately define a FRET threshold for intramolecular interactions, we produced immature  
139 HIV-1 virions<sup>22</sup> and co-labelled them with nanobodies NbA488 and NbA594. In this case,  
140 only two FRET regimes could be determined: i) low or no-FRET ( $E_{\text{app}} < 0.7$ ) and ii)  
141 moderate FRET efficiency ( $0.7 < E_{\text{app}} < 0.17$ ) (Fig. 1E, left panel) suggesting that Env in  
142 immature viruses adopts at least two conformational states. Addition of saturating  
143 concentrations of sCD4<sub>D1-D4</sub> to immature virions stabilized the low or no-FRET open  
144 conformation ( $E_{\text{app}} < 0.7$ ) (Fig. 1E, right panel), as observed in mature virions, showing that  
145 immature particles, although impaired for fusion<sup>12,23,24</sup>, conserve intramolecular dynamics.

146 When comparing the HIV Env conformations in unbound mature and immature HIV-1<sub>Gag-GFP</sub>  
147 HXB2 V4-GFP<sub>OPT</sub> particles (Fig. 1D and E, left panels), the most prevalent conformation for both  
148 was the one showing intermediate FRET efficiencies. It has been previously reported that  
149 unligated mature Env preferentially adopts a closed conformation<sup>9,25</sup>. Therefore, we  
150 hypothesized that these moderate FRET values could represent a closed ground-state  
151 conformation, as this conformation would reduce the distance between V4 loops within the  
152 Env trimer and thus, labels could be close enough to give intramolecular FRET. In turn, both  
153 mature and immature virions in presence of sCD4<sub>D1-D4</sub> (Fig. 1D and E, right panels) showed a  
154 predominant low or no-FRET efficiency population, that we could attribute to open Env  
155 conformation. Interestingly, high FRET regimes were only observed in mature virions ( $E_{\text{app}} >$   
156  $0.23$ ), preferentially in the absence of sCD4<sub>D1-D4</sub> ligand (Fig 1D, left panel). Given that the  
157 Env cluster distribution depends on the maturation state of virions<sup>12</sup>, we attributed high  
158 FRET regimes to intermolecular Env interactions.

159 To confirm that high FRET regimes correspond to Env intermolecular interactions, HIV-1  
160 pseudoparticles were produced incorporating the GFP<sub>OPT</sub> in the V1 loop of gp120 Env  
161 glycoprotein instead of the V4 loop (HIV-1<sub>Gag-GFP</sub> HXB2 V1-GFP<sub>OPT</sub>). Note, that this specific  
162 labelling strategy was also previously tested for fusogenic Env functionalities<sup>14</sup>. This  
163 labelling approach that positions the donor and acceptor fluorophores proximal to the apex of  
164 Env when adopting a closed conformation<sup>26</sup>, is expected to increase the distance between  
165 different Env trimers and therefore drastically reduce or eliminate the intermolecular FRET,

166 if any, between Envs (Fig. S2). Viruses with Env labelled with GFP<sub>OPT</sub> V1 were exposed to  
167 nanobodies coupled to the donor alone (NbA488) or to both, donor and acceptor dipoles  
168 (NbA488 and NbA594, respectively). We observed a slight increase in the FRET efficiency  
169 in presence of the FRET pair compared to the donor alone condition in both, mature (Fig.  
170 S2C) and immature particles (Fig. S2D). However, FRET efficiency was not higher than  
171 0.23, as observed in mature HIV-1<sub>Gag-GFP HXB2 V4-GFP<sub>OPT</sub></sub> virions, showing that labelling of the  
172 V4 loop in Env is critical to observe Env intermolecular interactions occurring in mature  
173 HIV-1 virions.

174 Therefore, these experiments combining FRET-FLIM to study mature and immature HIV-1  
175 particles, allowed us to discriminate intramolecular (open:  $E_{app} < 0.12$ ; closed:  $0.12 < E_{app} <$   
176  $0.23$ ) from intermolecular ( $E_{app} > 0.23$ ) interactions. Of note, while different intramolecular  
177 conformations were observed in both, mature and immature particles, intermolecular  
178 interactions were only seen in mature HIV-1 virions, suggesting that HIV-1 maturation  
179 affects Env clustering but not intramolecular Env conformations. These data also show that  
180 sCD4 not only stabilized the open Env conformation, but also disrupted Env clusters as the  
181 high FRET regime detected in mature HIV virions was drastically reduced.

182

### 183 **Intermolecular Env conformations are maturation-dependent and modulated by sCD4** 184 **and neutralizing antibodies**

185

186 We further investigated HIV-1 Env cluster formation by single-molecule photobleaching  
187 (SMPB)<sup>27</sup>. This approach relies on the observation of photobleaching dynamics of  
188 fluorophores upon continuous illumination. Direct counting of intensity drops from the  
189 photobleaching traces reveals the number of fluorescent molecules within the focal volume.  
190 In our system, we assumed that constant number of Env glycoproteins are incorporated into  
191 HIV-1 virions, irrespectively of the maturation state of viral particles, as previously observed  
192 <sup>12,23,24</sup>. However, we expected to detect relative changes in the number of photobleaching  
193 events and/or the overall photobleaching kinetics of mature vs immature viral particles, as a  
194 consequence of different Env distribution within the viral membrane and higher probability  
195 of synchronous photobleaching of Env molecules within clusters<sup>27</sup>. In order to be able to  
196 spectrally discriminate the Env glycoprotein from the Gag-GFP labelled capsid, mature or  
197 immature HIV-1 virions were incubated with NbA594 (Fig. 2A). Photobleaching of the Atto

198 594 fluorophore was induced by applying a continuous 594 nm laser to the sample and  
199 imaged during 350 s. The first 200 s after laser excitation induced the overall intensity decay  
200 to drop toward background levels close to zero, suggesting that the bleaching of most of the  
201 fluorophores in the sample had occurred (Fig. 2B). Single-drop steps from individual double  
202 labelled HIV virions were manually counted from the intensity traces, in both, mature and  
203 immature particles, in absence (Fig. 2B) or presence of sCD4<sub>D1-D4</sub> (Fig. S3A). To exclude any  
204 bias in single-drop step quantification, we calculated the mean histogram of all traces per  
205 condition and fitted the data to different multi peak Gaussian models; choosing the ones with  
206 the reduced Chi-square value closest to 1 (Fig. 2C). We observed a good correlation between  
207 the number of resulting Gaussians and the mean of the single-drop step quantification for  
208 each condition, which resulted in  $5.1 \pm 1.1$  photobleaching events in case of mature viruses  
209 and a statistically significant decrease ( $3.1 \pm 1.1$  photobleaching events) for immature viruses  
210 (Fig. 2D). Addition of sCD4<sub>D1-D4</sub> to mature virions caused a slight decrease in the number of  
211 photobleaching events observed ( $4.3 \pm 1.1$ ), albeit not statistically significant, and no additive  
212 effect in case of immature virions was observed ( $3.5 \pm 1.2$ ).

213 To assess whether the photobleaching kinetics of the Atto 594 fluorophore were affected by  
214 differences in HIV-1 Env conformation, we compared the cumulative distribution of the  
215 intensity traces in mature vs immature virions, in presence or absence of the soluble HIV-1  
216 Env ligand sCD4<sub>D1-D4</sub>. We observed that kinetics of photobleaching are faster in mature HIV-  
217 1<sub>Gag-GFP HXB2 V4-GFP<sub>opt</sub></sub> virions compared to immature virions, in a statistically significant  
218 manner. Interestingly, binding of sCD4<sub>D1-D4</sub> to HXB2 V4-GFP<sub>opt</sub> Env also induced a delay in  
219 photobleaching of Atto 594 in mature viruses, causing no additive effect in immature virions.  
220 These results show that incomplete maturation or binding of CD4 to mature HIV-1 virions  
221 induce a redistribution of HXB2 Env within the viral membrane and suggest a functional  
222 implication of the cluster conformation of Env during the pre-fusion reaction.

223 Seeking to know whether the intermolecular dynamics observed in HXB2 Env are strain-  
224 specific or instead it is a common behaviour shared across other HIV-1 strains, we performed  
225 similar photobleaching experiments with pseudoviruses bearing the R5-tropic, clinical  
226 isolate, JR-FL Env (Fig. 3) or the X4-tropic, laboratory-adapted, NL4-3 Env glycoprotein  
227 (Fig. 4) (tier 2 and tier 1A, respectively). In this case, pseudoviruses were produced labelling  
228 the HIV-1 Gag precursor with GFP but with unlabelled Env, to keep protein dynamics and  
229 their fusogenic activity under native conditions. HIV-1 mature or immature virions were  
230 incubated in presence or absence of soluble sCD4<sub>D1-D4</sub> and the sample was later subjected to



231 fixation and revealed by immunostaining (Fig. 3A). The anti-gp120 HIV-1 antibody b12 was  
232 used as primary antibody and an anti-human coupled to Alexa 633, was used as secondary  
233 antibody. It is worth noting that sample fixation was carried out before incubation with the  
234 b12 antibody to prevent any possible effect on Env distribution caused by the neutralizing  
235 antibody. Photobleaching was induced by continuous laser 633nm excitation of the Alexa  
236 633 fluorophore on labelled virions. The resulting intensity traces and corresponding  
237 histograms were analyzed to obtain the average number of discrete photobleaching steps for  
238 each condition in both, HIV-1 JR-FL Env (Fig. 3B-C; Fig. S4) and HIV-1 NL4-3 Env viruses  
239 (Fig.4A-B; FigS5A). Interestingly, we could observe a similar tendency of the  
240 photobleaching dynamics in virions bearing JR-FL (Fig. 3C) or NL4-3 (Fig. 4B). In both  
241 cases, photobleaching events were significantly reduced, in a statistical manner, in immature  
242 viruses compared to mature virions, and the same effect was observed when exposing virions  
243 to soluble CD4. Of note, the number of photobleaching events in HIV-1 NL4-3 Env mature  
244 virions was higher ( $8.9 \pm 2.1$ ) compared to JR-FL or HXB2 ( $3.8 \pm 1$  and  $5.1 \pm 1.1$ , respectively)  
245 pseudo-typed virions, which could reflect a difference in the relative number of Envs within  
246 the cluster, depending on the Env subtype. Photobleaching kinetics on JR-FL pseudo-typed  
247 virions turned out to be faster in mature virions compared to immature virions or in presence  
248 of its ligand, CD4 (Fig. 3D). This result was consistent with the photobleaching kinetics  
249 observed in mature vs immature HIV-1 NL4-3 Env virions, although the presence of sCD4  
250 did not induce a significant delay in this case (Fig. 4C).

251 With the aim to further characterize the functional aspect of the intermolecular conformations  
252 of Env, we investigated the effect of well-known HIV-1 broad neutralizing antibodies  
253 (bNAbs) on Env cluster formation. For this experiment, we selected three different antibodies  
254 recognizing separated regions of Env: PGT145, which recognizes the HIV-1 apex<sup>28</sup>; B12,  
255 which binds to an overlapping region of gp120 with the site of CD4 attachment<sup>29,30</sup>; and  
256 10E8 which is directed against the membrane-proximal external region (MPER)<sup>31</sup>.  
257 Moreover, these antibodies show high (PGT145 and 10E8) to moderate (b12) ability to  
258 neutralize different HIV-1 isolates<sup>32</sup>. bNAbs were incubated with mature HIV-1 virions  
259 before sample fixation, and subsequently exposed to anti-human secondary antibodies  
260 coupled with Alexa 633 fluorophore (Fig. 3E). Strikingly, binding of bNAbs to HIV-1 JR-FL  
261 Env (Fig. 3F; Fig. S4B) or NL4-3 (Fig. 4D; Fig. S5B) induced a statistically significant  
262 reduction in the number of photobleaching events detected, with PGT145 showing the  
263 strongest effect, in both cases ( $1.5 \pm 0.8$  for JR-FL and  $1.8 \pm 0.8$  for NL4-3). Incubation of

264 mature HIV-1 JR-FL with bNAbs also caused a delay in photobleaching kinetics (Fig. 3G). A  
265 similar effect was observed when exposing HIV-1 NL4-3 Env virions to B12 and PGT145,  
266 but not to 10E8.

267 Overall, these experiments show that the cluster conformation of Env within the viral  
268 membrane depends on virion maturation. Furthermore, this conformation is impaired upon  
269 binding of Env to soluble CD4 and when mature virions are exposed to bNAbs targeting  
270 different epitopes of Env, suggesting a functional implication of intermolecular dynamics of  
271 Env during the pre-fusion reaction.

272

273 **Intermolecular Env clusters are destabilized during the prefusion reaction in live T**  
274 **cells.**

275

276 In order to investigate the intra- and intermolecular dynamics of HIV-1 Env in a  
277 physiological context, we studied the sequence of intra- and intermolecular transitions of  
278 HIV-1<sub>Gag-GFP HXB2 V4-GFP<sub>OPT</sub></sub> virions labelled with donor (NbA488) and acceptor (NbA594)  
279 fluorophores when engaged to MT-4 T cells (Fig. 5A). We examined the time-resolved  
280 lifetimes and apparent FRET efficiencies that were simultaneously acquired at a time  
281 resolution of 3 s per FLIM image during 5 min (Fig. 5B). The three different  $E_{app}$  regimes  
282 previously described (low,  $E_{app} < 0.12$ ; intermediate,  $0.12 < E_{app} < 0.23$  and high,  $E_{app} > 0.23$ )  
283 were taken as a reference to filter out each of the dwell times coming from individual  $E_{app}$   
284 trajectories (Fig. 5B). The three dwell time distributions coming from at least 24 individual  
285 HIV-1 virions with a good signal to noise (between 100 and 1000 photons per pixel) were  
286 plotted as cumulative distribution functions (CDF) that, in turn, represent the average kinetics  
287 of each Env conformational states (Fig. 5C). The half lifetime of each one of the cumulative  
288 distributions provides quantitative information on the stability of each dynamic  
289 conformational state: a shorter CDF half lifetime implies a fast transition, and therefore, a  
290 very unstable Env conformational state, and a long CDF half lifetime translates instead in  
291 slow Env kinetics and stable Env conformational states. We first analyzed the CDF kinetics  
292 of mature HIV-1<sub>Gag-GFP HXB2 V4-GFP<sub>OPT</sub></sub> particles *in vitro*. For the low  $E_{app}$  regime, corresponding  
293 to the open Env conformation, we observed a half lifetime of  $\tau_{(1/2)} = 92$  s. The intermediate  
294  $E_{app}$  regime ( $0.12 < E < 0.23$ ) cumulative distribution kinetics, corresponding to the closed Env  
295 conformation gave a  $\tau_{(1/2)} = 170$  s. The long CDF lifetime of this particular closed Env

296 conformation assumes a very stable and predominant state over the open conformation for  
297 unbound Env. In turn, the high FRET kinetic regime of Env cluster formation ( $E_{app} > 0.23$ )  
298 gave a  $\tau_{(1/2)} = 22$  s.

299 When the HIV-1<sub>Gag-GFP HXB2 V4-GFP<sub>OPT</sub></sub> virions were engaged to living MT-4 T cells ( $n = 20$ ),  
300 both the intramolecular and intermolecular Env landscape drastically changed compared to  
301 the previous condition with unliganded Env (Fig. 5C). A delayed and therefore more stable  
302 cumulative distribution kinetics was found for the populations corresponding to Env open  
303 conformation ( $\tau_{(1/2)} = 152$  s). The dynamic behaviour of the Env closed conformation in  
304 presence of T cells showed a half lifetime of  $\tau_{(1/2)} = 58$  s, which is faster and therefore less  
305 stable than in absence of T cells (Fig. 5C, middle chart); suggesting that Env might have  
306 already interacted with CD4 molecules exposed to the cell membrane of MT-4 T cells and  
307 hence, inducing an open conformation in the prefusion reaction<sup>5</sup>. Finally, we observed that  
308 the Env cluster conformation when engaged to T cells was destabilized as compared to  
309 virions *in vitro* ( $\tau_{(1/2)} = 12$  s).

310 This generalized behaviour for the three Env conformational regimes defined above followed  
311 a similar tendency with the addition of sCD4<sub>D1-D4</sub> (Fig. 5D). The open conformation was  
312 readily stabilized upon addition of the HIV-1 soluble receptor ( $\tau_{(1/2)} = 253$  s; Fig. 5D, left  
313 chart), as opposed to the closed conformation which was clearly destabilized ( $\tau_{(1/2)} = 85$  s;  
314 Fig. 5D, middle chart). Destabilization of the Env cluster upon addition of sCD4<sub>D1-D4</sub> was  
315 more drastic compared to virions engaged to T cells ( $\tau_{(1/2)} = 1$  s, Fig. 5D, right chart), which  
316 might be the result of higher number of Env molecules binding to its receptor, due to the  
317 exposure of virions to saturating concentrations of sCD4<sub>D1-D4</sub>.

318 We have thus shown that HIV-1 Env transitions towards an open conformation with longer  
319 CDF half lifetimes when engaged to T cells as compared to *in vitro* virions. This implies an  
320 overall increase in CDF half lifetime for Env open conformation of  $\sim 60$  s ( $\Delta_{time} = \tau_{(1/2)}(T\ cells) -$   
321  $\tau_{(1/2)}(in\ vitro) = 152\ s - 92\ s = 60\ s$ ); concomitantly the CDF half lifetime for the Env closed  
322 conformation was shorter and more unstable with an overall decrease of  $\sim 1.86$  min ( $\Delta_{time} =$   
323  $58\ s - 170\ s = -112\ s$ ). Finally, Env cluster dissociation kinetics were also favored, giving rise  
324 to shorter CDF half lifetimes and more unstable Env intermolecular interactions with an  
325 overall decrease of 10 s ( $\Delta_{time} = 12\ s - 22\ s = -10\ s$ ). Overall, we have found that Env  
326 transitions between at open, closed and clustered conformational states. These Env dynamic  
327 states are shifted towards more stable Env open conformation, as opposed to the closed and

328 cluster conformations in sCD4-bound virions or when primed to T cells, suggesting a  
329 potential dissociation of Env clusters into separate trimers upon engagement to CD4 on T  
330 cells.

331

### 332 **HIV-1 Env cluster disruption as a common mechanism for antibody neutralization**

333 Next, we examined how the addition of inhibitory concentrations of different bNAbs affected  
334 the conformational dynamics of Env when engaged in the prefusion complex with living T  
335 cells (Fig. 6). HIV-1<sub>Gag-GFP HXB2 V4-GFP<sub>OPT</sub></sub> viruses on the surface of MT4 T cells were exposed  
336 to inhibitory concentrations of PGT145, b12 and 10E8. These bNAbs do recognize different  
337 Env regions of vulnerability and show selective preferences towards specific Env  
338 conformations<sup>33</sup>. PGT145 has been previously reported to recognize the quaternary structure  
339 of the Env apex trimer, thus, stabilizing a closed conformation of HIV-1 Env<sup>28</sup>. B12, as  
340 opposed to CD4, is unable to bind the closed conformation of Env, although upon binding,  
341 b12 prevents reversion back to the closed state<sup>29</sup>, thus stabilizing an intermediate/open  
342 conformation<sup>30</sup>. Finally, 10E8 targets a quaternary epitope including lipid and MPER  
343 contacts<sup>31</sup> stabilizing an open conformation<sup>25</sup>.

344 Our smFRET data indicate that PGT145 exhibited a tendency to destabilize the open Env  
345 conformation triggered by Env binding to the CD4 T cell receptor (from  $\tau_{(1/2)} = 152$  s to  $\tau_{(1/2)} =$   
346 118 s) and, consequently, reversing the CDF half lifetime towards a closed Env conformation  
347 (from  $\tau_{(1/2)} = 58$  s to  $\tau_{(1/2)} = 120$  s) (Fig. 6A, left and middle chart). We also observed a  
348 destabilization of the Env open conformation when virions were incubated with T cells in  
349 presence of the b12 neutralizing antibody (from  $\tau_{(1/2)} = 152$  s to  $\tau_{(1/2)} = 1$  s). Concomitantly,  
350 b12 induced a stabilization of the closed Env conformation (from  $\tau_{(1/2)} = 58$  s to  $\tau_{(1/2)} = 92$  s),  
351 although less efficiently than the apex-directed PGT145 antibody (Fig. 6B, left and middle  
352 chart). In turn, the anti-MPER antibody, 10E8, induced a strong stabilization of the open Env  
353 conformation (from  $\tau_{(1/2)} = 152$  s to  $\tau_{(1/2)} = 250$  s) and consistently, the closed conformation  
354 kinetics were very similar in absence or in presence of the antibody (from  $\tau_{(1/2)} = 58$  s, to  $\tau_{(1/2)} =$   
355 58.2 s) (Fig. 6C, left and middle chart). Interestingly, the three antibodies tested induced a  
356 drastic destabilization of the Env cluster (from  $\tau_{(1/2)} = 12$  s to  $\tau_{(1/2)} = 3$  s, for PGT145; to  $\tau_{(1/2)} =$   
357 1 s, b12; to  $\tau_{(1/2)} = 0.8$  s, 10E8) (Fig. 6A-C, right chart).

358 In light of these results, a structural model summarizing the intramolecular conformations of  
359 HXB2 V4-GFP<sub>OPT</sub> Env observed for each neutralizing antibody is shown in Fig. 6D. In our

360 system, a closed Env conformation was stabilized when incubating HIV-1 virions engaged to  
361 T cells in presence PGT145, whereas the b12 antibody favours an intermediate  
362 intramolecular conformation of Env and, instead, a stable open conformation was observed  
363 upon 10E8 addition. Furthermore, these results show that bNAbs, which are known to  
364 stabilize intramolecular conformations of Env, strongly impair intermolecular dynamics of  
365 Env by destabilizing and dissociating the Env cluster during the pre-fusion reaction of HIV-1  
366 virions on T cells. Therefore, these results suggest a common mechanism of Env cluster  
367 disruption by bNAbs even though each one of them binds to different Env regions. Moreover,  
368 these data also point to Env cluster dissociation as an effective and potentially common  
369 strategy to inhibit HIV-1 fusion with T cells.

370

## 371 **Discussion**

372

373 We have found a previously underappreciated mechanism involving Env intermolecular  
374 dynamics that might be crucial during the prefusion reaction. We have quantitatively shown  
375 how Env intermolecular interactions are reduced when primed to live MT-4 T cells.  
376 Furthermore, we have shown that three different families of bNAbs, targeting different Env  
377 epitopes (PGT145 targets the apex, b12 the CD4-binding region and 10E8 the membrane  
378 proximal external region (MPER) of Env)<sup>33</sup>, disrupt Env clusters both *in vitro* (Fig. 3-4) and  
379 when engaged to live T cells (Fig. 6). Moreover, we have observed that cluster formation and  
380 dissociation by CD4- or bNAb-binding is a common mechanism shared across laboratory-  
381 adapted HXB2 and NL4-3 strains, and the clinical isolate JR-FL strain. In addition, our  
382 FRET-FLIM imaging system allowed us to reconcile dynamics of intra- and intermolecular  
383 interactions of Env, which dynamically transits between open and closed conformations and  
384 cluster association and dissociation in mature, unligated HIV-1 virions. These data were  
385 further validated with built in controls within the same experiments which gave us  
386 concomitant closed Env conformation stabilization upon Env binding to PGT145, an  
387 intermediate Env conformation in case of b12 and open Env conformation stabilization when  
388 bound to 10E8 or CD4 (Fig. 7).

## 389 **Detection of intra- and intermolecular HIV-1 Env dynamics**

390 The experimental design in this study has been crucial to evaluate intra- and intermolecular  
391 interactions of Env in native virions *in vitro* and engaged to T cells. Key parameters include  
392 the time-scale of acquisitions, the labelling strategy and resolution of dynamic interactions.

393 Previous results on Env intramolecular dynamics were recovered employing single molecule  
394 FRET combined with Total Internal Reflection Microscopy (TIRF)<sup>8,9,21</sup>. This technology  
395 combined with dually labeled Env molecules using short peptides introduced into different  
396 gp120 loops provided an outstanding platform to evaluate V1 loop conformational changes<sup>9</sup>.  
397 The time-acquisition for their single molecule FRET experiments was restricted to ~10 s  
398 (with 25 frames per second) prior to bleaching of the fluorophores. Although with a great  
399 time-resolution, this technique would fail to detect long-time lapse Env dynamics (in the  
400 range of seconds and minutes). Importantly, the high power laser needed to collect enough  
401 photons for the analysis would induce virus phototoxicity<sup>34</sup>, which in turn might affect Env  
402 conformational dynamics. Of note, our two photon FRET-FLIM data were acquired for 5 min  
403 with a FLIM time resolution of 3 s, with minimal photobleaching. Moreover, according to  
404 our own data presented here, and to a number of biophysical studies<sup>3,12</sup> a longer time-scale  
405 might be crucial to detect Env intermolecular conformational dynamics given the slow Env  
406 diffusion coefficient in mature HIV-1 particles ( $D = 0.002 \mu\text{m}^2/\text{sec}$  in mature particles<sup>3</sup>). In  
407 this sense, the excitation source utilized in this work has been key to visualize HIV-1 Env  
408 dynamics engaged to living T cells. Two photon excitation provides high three-dimensional  
409 contrast and resolution without the need for optical filters (i.e. pinhole or notch filters) in the  
410 detection path. This, combined with digital photon counting (HyD) descanned detectors  
411 situated very close to a high numerical aperture objective, gave a high signal-to-noise ratio.  
412 Since two photon excitation is naturally confocal<sup>35</sup>, only the viruses engaged in the MT-4 T  
413 cells were imaged and all emission photons gave a valuable signal, with reduced  
414 phototoxicity, allowing longer acquisitions times whilst conserving resolution and high  
415 contrast. Lastly, two photon excitation also provided a localized excitation where all emission  
416 photons constitute a useful signal that contributed to our rapid FLIM acquisitions.

417 The labeling strategy when performing FRET experiments is also crucial. A labeling  
418 approach strictly circumscribed to Env could be a restraint. In this scenario, one could not  
419 guarantee that all particles analyzed could be bona fide HIV-1 virions with their  
420 corresponding capsids. Here, we tagged the HIV-1 capsid (Gag-GFP) and the gp120 V4  
421 domain of Env with a super-folding GFP (GFP<sub>OPT</sub>)<sup>14</sup>. Even if all emitted photons from these  
422 labels are green, lifetime imaging permitted discrimination of mature versus immature  
423 viruses. On top of that, we employed labelled nanobodies<sup>5</sup> that specifically bind to GFP (in  
424 our system, only GFP<sub>OPT</sub> is accessible to nanobodies) that could be accurately detected given  
425 the difference in lifetime signatures between NbA488 and GFP (Fig. 1-4). At least 5 amino

426 acid residues linking GFP<sub>OPT</sub> with the V4 and V1 loops of gp120 allow free, or random  
427 rotation of the fluorophores, thus, minimizing problems related to the relative dipole-dipole  
428 orientation (and here, one could approximate  $K^2 = 2/3$ ). Under these circumstances, FRET  
429 interpretation is restricted to protein folding and protein-protein interactions. (Fig. 7 and Fig.  
430 S5).

431 Choosing the label location within the Env glycoprotein is not trivial. To resolve both, intra-  
432 and intermolecular interactions, the V4 loop of the gp120 was selected, as the side location of  
433 this residue facilitates FRET to occur between different Env trimers. Also, in our system, all  
434 Env proteins within HIV-1 virions were labelled with GFP<sub>OPT</sub>, increasing the presence of  
435 multiple acceptors per donor molecule in conditions of Env cluster formation and thus,  
436 facilitating an increased energy transfer and an additional shortening of the donor lifetime<sup>36</sup>.

437 In previous reports, Env cluster characterization has been performed applying techniques  
438 such as STED<sup>3,12,37</sup>, 3D STORM<sup>38</sup> or Cryo-ET<sup>39,40</sup>. While these techniques offer incredibly  
439 high spatial resolution, they are unable to resolve Env conformational dynamics. Here, we  
440 employed a FRET-FLIM approach as a molecular ruler for the study of different Env  
441 conformation transitions on the nanoscale (~2–10 nm). This technique allowed us to detect  
442 subtle modulations of Env trimer interactions in real time when binding to neutralizing  
443 antibodies or upon CD4-receptor binding of HIV-1 virions onto T cells, that were previously  
444 unappreciated<sup>12,37</sup>.

445 Single Step Photobleaching, has previously been applied to HIV-1 Env *in vitro*<sup>41</sup>. This  
446 approach was able to produce quantitative results on the number of soluble CD4 molecules  
447 per Env SOSIP.664 purified and immobilized in a glass coverslip. Here, we have taken this  
448 approach one step further by employing single step photobleaching on native HIV-1 virions.  
449 Even if Single Step Photobleaching is unable to produce time-resolved data and information  
450 on the Env intramolecular dynamics; we could resolve Env clusters in mature particles for the  
451 three Env tested, reinforcing the idea of the functional relevance of Env clusters as a pre-  
452 requisite to start the fusion reaction.

453

454 **Env conformation dynamics are modulated during HIV-1 prefusion reaction and are**  
455 **disrupted by bNAbs**

456 In previous studies, HIV-1 Env has been described to exist in at least three intramolecular  
457 conformational states by using smFRET approaches<sup>7-9,21</sup>. Unligated Env dynamically transits

458 between different intramolecular conformations, although with a preference to pre-triggered,  
459 closed conformation (state 1). Binding to CD4 would first induce an asymmetric opening of  
460 Env (state 2) that ultimately leads to binding to its coreceptor CXCR4 or CCR5 (state 3) for  
461 subsequent fusion with the host membrane. Ensemble analysis of  $E_{app}$  in our system, resolved  
462 two different intramolecular conformations. We designed them as open and closed  
463 conformations. Open conformation showed the lowest FRET efficiency and was stabilized  
464 upon binding to sCD4<sub>D1-D4</sub> in mature and immature virions. The concentration used in this  
465 assay (10  $\mu$ g/mL) has been associated to three-CD4-bound conformation<sup>41</sup>, hence we might  
466 relate this conformation with previously described as state 3. Closed conformation was  
467 characterized in our approach by moderate FRET efficiency regimes and was predominant in  
468 unligated mature virions. We further confirm this hypothesis when analyzing  $E_{app}$  time-  
469 resolved tracks from mature HIV-1 particles primed to T cells in presence of the PGT145  
470 bNAb, which is known to have a preference for the closed Env conformation<sup>28</sup> and induced  
471 stabilization of the moderate FRET efficiency population in our assays. Therefore, the closed  
472 env conformation in our system could relate to previously assigned as state 1 conformation.  
473 Intermediate opening of Env was not clearly resolved by our ensemble  $E_{app}$  analysis.  
474 However, we observed subtle differences in the degree of stabilization of the open  
475 conformation when comparing  $E_{app}$  kinetics in mature HIV-1 in absence or presence of T  
476 cells or in absence or presence of the bNAbs b12 or 10E8, suggesting the existence of  
477 intermediate open states with different degrees of stability as previously observed<sup>8,25</sup>.

478 When comparing multiparameter plots of  $E_{app}$  and lifetime of mature vs immature virions, we  
479 observed that high FRET efficiency regimes corresponded to intermolecular interactions of  
480 Env, as they were only observed in mature virions labelled at the V4 loop of gp120. When  
481 taking a closer look at  $E_{app}$  time-resolved tracks from mature HIV-1 particles *in vitro*, and  
482 also primed to T cells, the transition towards Env clusters always occurred via the Env closed  
483 conformation, and never from an Env open conformation (Fig. 7). We also observed  
484 dissociation of intermolecular Env interactions when HIV-1 virions were primed with T cells  
485 or in presence of sCD4<sub>D1-D4</sub>. These observations suggest that Env cluster formation requires  
486 Env to adopt a closed conformation, and its dissociation is triggered by receptor binding.

487 Using a single-photobleaching approach, we were able to see statistically relevant differences  
488 in both the number of steps and the photobleaching kinetics for three HIV-1 virions  
489 pseudotyped with NL4-3, HXB2 and JR-FL. We found that at least three Envs are  
490 incorporated in clusters for HIV-1 mature viruses decorated with NL4.3 Env (~9



491 photobleaching steps) and at least two in HXB2 and JR-FL (~5 photobleaching steps in  
492 each). Provided that most likely not all Env trimers were fully labeled, this estimation would  
493 count for the minimal amount of Env particles present in each cluster. This approach clearly  
494 shows two things, first, mature particles irrespective of Env (tier 1A, 1B and 2) tend to form  
495 clusters and second, receptor binding in all cases disrupts these clusters. In all cases, the  
496 addition of ligands (either sCD4<sub>D1-D4</sub> or bNAbs) disrupted the Env cluster; only seen in  
497 mature HIV-1 virions.

498 Overall, our data clearly shows that Env cluster association and dissociation is a key factor in  
499 mature HIV-1 particles and play a fundamental role during immune evasion. Moreover, the  
500 mechanism of masking different Env regions by neutralizing antibodies might also be related  
501 to the intermolecular dynamics of Env and immune evasion. Taken together, this work  
502 suggests that destabilizing Env clusters could represent a common strategy to arrest and  
503 inhibit viral fusion machines.

504

## 505 **Acknowledgements**

506

507 We thank Zene Matsuda for the kind gift of HIV-1 Env labeled plasmids. We thank Leica  
508 Microsystems for technological support. We thank the Padilla-Parra lab for valuable  
509 discussions and criticism of the paper. This work has been supported by the European  
510 Research Council (ERC-2019-CoG-863869 FUSION to S.P.-P.) and the Wellcome Trust Core  
511 Award (203141).

512

513

514

## 515 **Author Contributions**

516

517 Conceptualization, S.P.-P.; methodology, I.C.-A., T.M. and S.P.-P.; validation, I.C.-A. and  
518 S.P.-P.; formal analysis, I.C.-A. T.M and S.P.-P.; investigation, I.C.-A, T.M. and S.P.-P.;  
519 resources, S.P.-P.; data curation, I.C.-A. and S.P.-P.; writing—original draft preparation,  
520 S.P.-P.; writing—review and editing, I.C.-A., T.M. and S.P.-P.; visualization, I.C.-A. T.M  
521 and S.P.-P.; supervision, S.P.-P.; project administration, S.P.-P.; funding acquisition, S.P.-P.  
522 All authors have read and agreed to the published version of the manuscript;

523

524 **Declaration of Interests**

525

526 Authors declare no competing interests. Data and materials availability: All data is available  
527 in the main text or the supplementary materials.

528

529

530

## 531 **Material and Methods**

532

### 533 **Cell Culture**

534

535 Lenti-X<sup>TM</sup> 293T cells (Takara Bio, Clontech, Saint Germain en Laye, France) were grown  
536 using complete Dulbecco's Modified Eagle Medium F-12 (DMEM F-12) (Thermo Fisher  
537 Waltham, MA, USA), supplemented with 10% fetal bovine serum (FBS), 1% penicillin-  
538 streptomycin (PS), and 1% L-glutamine. MT4 T (provided by Alex Compton, NCI Center for  
539 Cancer Research, Frederick, MD, USA) were cultured in RPMI 1640 medium containing  
540 10% FBS, 1% PS and 1% L-glutamine. Cells were maintained in a 37 °C incubator supplied  
541 with 5% CO<sub>2</sub>. For experiments, MT4 T cells were cultured in PBS 1x buffer containing 2%  
542 FBS and 15 mM HEPES.

543

### 544 **Reagents and antibodies**

545

546 Nanoboosters (Chromotek, Germany) targeting the GFP<sub>OPT</sub> of labeled Env  
547 GFP\_Booster\_Atto488 and/or RFP\_Booster\_Atto594 (ChromoTek GmbH, Planegg,  
548 Germany) were used in 1:200 final concentration. Human soluble CD4 recombinant protein  
549 (sCD4<sub>D1-D4</sub>; Cat.No:4615, NIH AIDS reagent program) and broad neutralizing antibodies:  
550 anti-HIV-1 gp120 monoclonal, PGT145 (Cat. No: 12703, NIH AIDS reagent program); anti-  
551 HIV-1 gp41 monoclonal, 10E8 (Cat. No: 12294, NIH AIDS reagent program) and anti-HIV-1  
552 gp120 monoclonal, b12 (Cat. No: AB011, Polymun Scientific, Klosterneuburg, Austria),  
553 were used in FRET-FLIM and SMPB experiments.

554

### 555 **Plasmid constructs**

556

557 The pR8ΔEnv plasmid (encoding HIV-1 genome harbouring a deletion within Env), pcRev,  
558 NL4-3 Gag-iGFPΔEnv were kindly provided by Greg Melikyan (Emory University, Atlanta,  
559 GA, USA). The plasmids encoding the HXB2 gp120 V4 and V1 labeled with GFP<sub>OPT</sub> were a  
560 kind gift from Zene Matsuda (Institute of Biophysics, Chinese Academy of Sciences, China).  
561 Plasmid encoding the JR-FL Env was a kind gift from James Binley (Torrey Pines Institute  
562 for Molecular Studies) and NL4-3 Env coding plasmid was provided by Dr Alex Compton.

563 **Virus production**

564

565 Gag-GFP-containing, HXB2 V4-GFP<sub>OPT</sub> and HXB2 V1-GFP<sub>OPT</sub> pseudotyped viral particles  
566 were produced via transfection of 60-70% confluent Lenti-X<sup>TM</sup> 293T cells seeded in T175  
567 flasks. DNA plasmids were transfected into Lenti-X<sup>TM</sup> 293T cells using GeneJuice®  
568 (Novagen, Waltham, UK) according to manufacturer's protocol. Specifically, cells were  
569 transfected with 2 µg pR8ΔEnv, 1 µg pcRev, 3 µg of NL4-3 Gag-iGFPΔEnv and 3µg of the  
570 appropriate viral envelope. All transfection mixtures were then added to cells supplemented  
571 with complete DMEM F12, upon which time they were incubated in a 37 °C, 5% CO<sub>2</sub>  
572 incubator. 12 hours post-transfection, the medium was replaced with fresh, phenol-red free,  
573 complete DMEM F12 after washing with PBS. In the case of immature HIV-1 pseudovirus  
574 production, complete DMEM F-12 was supplemented with 300 nM of the HIV-1 protease  
575 inhibitor Saquinavir mesylate (Sigma-Aldrich, St. Louis, MO, USA). 72 h post-transfection,  
576 the supernatant containing virus particles was harvested and filtered with a 0.45 µm syringe  
577 filter (Sartorius Stedim Biotech). Filtered viral supernatants were concentrated 100 times  
578 using Lenti-X<sup>TM</sup> Concentrator (Takara Bio, Clontech, Saint Germain en Laye, France) and  
579 resuspended in phenol red-free medium, FluoroBrite DMEM (Thermo Fisher, Waltham, MA,  
580 USA), aliquoted and stored at -80 °C.

581

582 **Sample preparation**

583

584 HIV-1 viruses pseudotyped with labelled HXB2 Env and harbouring Gag-GFP were diluted  
585 in PBS 1x, 2% FBS buffer and plated onto a micro-slide (Cat.No: 81826, Ibidi, Gräfelfing,  
586 Germany) by centrifugation at 2100 g, 4°C during 20 min. Unbound viruses were removed  
587 and media replaced by diluted nanoboosters (NbA488 and/or Nb594) in presence or absence  
588 of 10 µg/mL sCD4<sub>D1-D4</sub> or 2 µM concentration of bNAbs in PBS 1x, 2% FBS at 20 µl final  
589 volume. The sample was then incubated for 1h at room temperature (RT) before image  
590 acquisition. In case of sample preparation for SMPB experiments, labelling of HXB2 V4-  
591 GFP was done after incubation for 1h at RT in absence or presence of sCD4<sub>D1-D4</sub> followed by  
592 sample fixation using 4% PFA in PBS 1x for 15 min at RT. Virions were then incubated with  
593 1:200 diluted NbA594 for 1h at RT. Labelling of HIV-1 viruses pseudotyped with JR-FL or  
594 NL4-3, and harbouring Gag-GFP was done after incubation for 1h at RT in absence or  
595 presence of sCD4<sub>D1-D4</sub> or bNAbs at the concentrations indicated above. The sample was then  
596 fixed using 4% PFA in PBS 1x for 15 min at RT. In case of virions incubated ± sCD4<sub>D1-D4</sub>,

597 the fixed sample was incubated with 1:500 dilution of b12 antibody for 1h at RT. Goat anti-  
598 human coupled to Alexa 633 fluorophore (Invitrogen) was used as secondary antibody  
599 diluted 1:500 and incubated for 30 min at RT. In case of virions incubated with bNAbs, the  
600 fixed sample was incubated with 1:500 dilution of goat anti-human coupled to Alexa 633  
601 fluorophore (Invitrogen) and incubated for 30 min at RT. Antibodies for immunostaining  
602 were diluted in PBS 1x in presence of 2% FBS to prevent unspecific binding and incubations  
603 were done in the dark to preserve the fluorophore staining.

604

### 605 **Single Virus Tracking**

606 MT-4 T cells were added onto surface-bound viruses in a final volume of 20  $\mu$ l. Cells were  
607 spun for 10 min at 600 g in a refrigerated centrifuge so that the HIV-1 particles could engage  
608 with the cells, without initiating the prefusion reaction. The observation micro-slides were  
609 then put under the microscope and the cold medium immediately replaced by medium at RT  
610 right at the moment when we started the imaging acquisition procedure. We employed the  
611 two photon SP8 X SMD DIVE FALCON confocal microscope (also described below)  
612 equipped with a dark incubator chamber for the frame.

613 Virus tracking was performed with both ImageJ plugin Spot tracker and the 64-bit software  
614 module from Imaris (BitPlane, Zurich, Switzerland), using an auto-regressive algorithm.  
615 Tracking provided quantitative information regarding the mean fluorescence intensities of the  
616 HIV-1 HXB2-GFP<sub>OPT</sub> with NbA488 (donor) collected in the non-descanned HyD1, the  
617 sensitized emission of the donor in the presence and absence of the acceptor HIV-1 HXB2-  
618 GFP<sub>OPT</sub> NbA488 (donor) and Nb594 (acceptor) was recovered in the second non-descanned  
619 HyD2. Tracking of individual particles both in vitro and when engaged in MT-4 T cells also  
620 provided FLIM values for the donor, particle's instantaneous velocity, trajectory and the  
621 mean square displacements (MSD).

622

### 623 **Fluorescence lifetime imaging microscopy (FLIM)**

624

625 In vitro HIV-1 labeled virions (mature and immature HIV-1 HXB2-GFP<sub>OPT</sub> NbA488 (donor)-  
626 Nb594 (acceptor)) and live MT-4 T cells exposed to HIV-1 particles were imaged using a  
627 DIVE SP8-X-SMD FALCON Leica microscope, Leica Microsystems (Manheim, Germany).  
628 Both, HIV-1 virions and MT-4 T cells of interest were selected under a 100x/1.4 oil

629 immersion objective corrected for infra-red light (IR). HIV-1 labeled virions were excited  
630 using a two-photon femtosecond pulsed laser tuned at 950 nm and 80 Mhz. The FALCON  
631 module was coupled with single photon counting electronics for rapid FLIM (Leica  
632 Microsystems) with virtual gating set at 97 ps. Green emission photons were subsequently  
633 detected by three hybrid non-descanned external detectors in photon counting mode with  
634 emission filters set at 500-550 nm, 600-650 nm and a long pass starting at 700 nm for the  
635 third HyD detector. Stacks of 100 images of time-resolved data acquired at 1-3 sec each for 5  
636 minutes were acquired for all experiments. HIV-1 HXB2-GFP<sub>OPT</sub> Nb594 (acceptor) particles  
637 were tested to avoid the possibility of cross-excitation of the acceptor (Nb594) with the two-  
638 photon laser tuned at 950 nm. No photons were detected in the acceptor channel with the  
639 power set at 10% of the laser power (Spectra Physics, UK). Leica software (LAS X) was  
640 employed to produce the phasor plots (Leica Microsystems, Mannheim, Germany). ImageJ  
641 (<https://imagej.nih.gov/ij/>) and Originlab (Northhampton, USA) were employed to produce  
642 the multiparameter two dimensional graphs and probability kernel maps comparing the  
643 apparent FRET efficiency (calculated as described below) with average lifetime data (given  
644 in picoseconds per pixel) and recovered with LAS X and previously treated with ImageJ to  
645 remove the noise.

646

647 Both, photon counting images for the donor (HyD1) and the sensitized FRET emission and  
648 FLIM micrographs simultaneously acquired by the two photon SP8 DIVE FALCON system  
649 using the same microscopy settings were background subtracted, to get rid of the scatter  
650 photons and white noise recovered by each HyD channel. After this, each single virus was  
651 profiled utilizing a mask that only contained the signal coming from each individual particle  
652 (in vitro or engaged in non-labeled T cells) and non-attributed-numbers for the background.  
653 Both, the time-resolved intensity and average lifetime values for each channel were obtained  
654 together with the average intensity values (in photons and not grey values). The average  
655 number of photons and average lifetime per channel for each profiled virus was obtained ( $n$   
656  $> 100$  particles for in vitro and  $n > 65$  for live cell imaging) and plotted as a multiparameter  
657 plot and phasor plot for each condition. Individual traces for each condition were also  
658 recovered following this procedure.

659

660

661

662

663

664

### 665 **FRET and FLIM image analysis**

666

667 FRET, is a nonradioactive, dipole-dipole coupling process where the energy is transferred  
668 from the excited donor fluorophore to the acceptor fluorophore when the distance and  
669 orientation of both dipoles are the right ones (typically within 10 nm and a random  
670 orientation). The excitation of the donor fluorophore induces a sensitized emission from the  
671 acceptor concomitantly quenching the fluorescence of the donor. This process, in the absence  
672 of acceptor would not occur. The HXB2 Env was fused to genetically encoded GFP<sub>OPT</sub> that in  
673 turn was labeled by nanoboosters (NbA488, playing the role of the donor and Nb594, playing  
674 the role of the acceptor), and the molecular dynamics of Env in question was then inferred by  
675 FRET between the fluorophores. The efficiency with which Förster-type energy transfer  
676 occurs is given by the next equations:

677

678 The FRET efficiency (E) can be calculated as the proportion of photons absorbed in the  
679 donor versus the excitation transferred to the acceptor:

680

$$681 \quad E = \frac{k_t}{k_t + k_D} \quad (1)$$

682

683 Where  $k_D$  is the sum of all relaxation pathways and  $k_T$  the transfer rate.

684

685 Experimentally we calculated  $E_{app}$  pixel by pixel utilizing the next equation

686

$$687 \quad E_{app} = \frac{I^{sens}}{I^D} - Bkr \quad (2)$$

688

689 The signal of the laser pulse and delayed photon arrivals were rapidly digitalized at high  
690 speed with a temporal resolution per channel of 97 ps, allowing very rapid FLIM acquisitions  
691 (1-3 sec per FLIM image). Pixel by pixel images with their corresponding background

692 subtracted average lifetime images were directly provided by the Leica software LAS X  
693 with the FALCON module. Single Photons coming from the donor/s (HIV-1 HXB2 V4 or  
694 V1-GFP<sub>OPT</sub> labelled with NbA488 (donor) in the presence and absence of NbA594  
695 (acceptor)) were detected in the non-descanned HyD detector. FLIM analysis was performed  
696 applying the non-fitting phasor plot approach fully integrated in the LAS X software.

697

### 698 **Intramolecular and intermolecular dynamics model**

699

700 The average time-resolved lifetimes and apparent FRET efficiencies that were simultaneously  
701 acquired at a time resolution of 3 sec per FLIM image during 5 minutes, coming from  
702 individual HIV-1 viruses were filtered using the next criteria (for each condition). The three  
703 different  $E_{app}$  regimes previously described (high,  $E_{app} > 0.23$ , intermediate  $0.12 < E_{app} < 0.23$   
704 and low  $E_{app} < 0.12$ ) were taken as a reference to select each of the dwell times coming from  
705 individual  $E_{app}$  trajectories. The three dwell time distributions coming from at least 20  
706 individual HIV-1 viruses per condition; were plotted as cumulative distribution functions  
707 (CDF). Only HIV-1 particles with a good signal to noise (between 100 and 1000 photons per  
708 pixel) were selected for all conditions. The  $t(1/2)$  was recovered for each CDF curves.

709

### 710 **Single Step Photobleaching acquisition and analysis**

711

712 In vitro HIV-1 virions (mature and immature HIV-1 HXB2 V4-GFP<sub>OPT</sub>, HIV-1 NL4.3 Env  
713 and HIV-1 JR-FL Env). were selected under a 100x/1.4 oil immersion objective corrected for  
714 infra-red light (IR). HIV-1 double labeled virions (containing Gag-GFP and labeled Env)  
715 were excited using either and HeNe laser tuned at 591 nm or an Argon laser tuned at 644 nm  
716 at high power. The SP8 system (described above) was coupled with single photon counting  
717 HyD detectors (Leica Microsystems). Red emission photons were subsequently detected by  
718 these hybrid detectors in photon counting mode with emission filters either set at 600-650 nm  
719 or 660 750 nm for Atto 594 and 644 respectively. ImageJ (<https://imagej.nih.gov/ij/>) and  
720 Originlab (Northhampton, USA) were employed to produce the single step photobleaching  
721 graphs and histograms All data was previously treated with ImageJ to remove the noise.

722

### 723 **Structural Models and Analysis**

724



725 A model for intra and intermolecular dynamics of the HXB2 Env labeled with GFP<sub>OPT</sub> and  
726 nanoboosters was built using the following structures: ligand-free HIV-1 Env mimic (BG505  
727 SOSIP.664) (PDB: 4ZMJ), HIV-1 Env mimic (B41 SOSIP.664) in complex with the  
728 ectodomain of CD4 (PDB: 5VN3), HIV-1 Env mimic (B41 SOSIP.664). Models were  
729 generated in Chimera, Coot, and Pymol (<https://pymol.org>).

730

### 731 **Statistics**

732

733 For FRET-FLIM analyses, calculation of multiparameter 2D kernel density plots and  $t(1/2)$  of  
734 CDF from  $E_{app}$  traces was performed using Originlab software (Northhampton, USA).  
735 Statistical analyses comparing the mean of the number of photobleaching events between  
736 conditions was done applying a one-way ANOVA and Sidak's multiple comparison test  
737 (significance  $p < 0.05$ ) calculated in GraphPad Prism 8 software (California, USA). Statistical  
738 comparison between photobleaching kinetics was performed applying a Kolmogorov-  
739 Smirnov test (significance  $p < 0.05$ ). Resulting histograms from photobleaching intensity  
740 traces were fitted to a multi-Gaussian model and the goodness of the fit was judged by  $\chi^2$   
741 values closest to 1. These analyses were performed using Originlab software.

742 **REFERENCES**

743

- 744 1 Lee, J. H., Ozorowski, G. & Ward, A. B. Cryo-EM structure of a native, fully  
745 glycosylated, cleaved HIV-1 envelope trimer. *Science* **351**, 1043-1048,  
746 doi:10.1126/science.aad2450 (2016).
- 747 2 Zhu, P. *et al.* Electron tomography analysis of envelope glycoprotein trimers on HIV  
748 and simian immunodeficiency virus virions. *Proc Natl Acad Sci U S A* **100**, 15812-  
749 15817, doi:10.1073/pnas.2634931100 (2003).
- 750 3 Chojnacki, J. *et al.* Envelope glycoprotein mobility on HIV-1 particles depends on the  
751 virus maturation state. *Nat Commun* **8**, 545, doi:10.1038/s41467-017-00515-6 (2017).
- 752 4 Ladinsky, M. S. *et al.* Electron tomography visualization of HIV-1 fusion with target  
753 cells using fusion inhibitors to trap the pre-hairpin intermediate. *Elife* **9**,  
754 doi:10.7554/eLife.58411 (2020).
- 755 5 Iliopoulou, M. *et al.* A dynamic three-step mechanism drives the HIV-1 pre-fusion  
756 reaction (vol 25, pg 814, 2018). *Nature Structural & Molecular Biology* **26**, 526-526,  
757 doi:10.1038/s41594-019-0244-8 (2019).
- 758 6 Yang, Z., Wang, H. Q., Liu, A. Z., Gristick, H. B. & Bjorkman, P. J. Asymmetric  
759 opening of HIV-1 Env bound to CD4 and a coreceptor-mimicking antibody (vol 26,  
760 pg 1127, 2019). *Nature Structural & Molecular Biology* **27**, 222-222,  
761 doi:10.1038/s41594-020-0381-0 (2020).
- 762 7 Alsaifi, N. *et al.* An Asymmetric Opening of HIV-1 Envelope Mediates Antibody-  
763 Dependent Cellular Cytotoxicity. *Cell Host Microbe* **25**, 578-587.e575,  
764 doi:10.1016/j.chom.2019.03.002 (2019).
- 765 8 Ma, X. *et al.* HIV-1 Env trimer opens through an asymmetric intermediate in which  
766 individual protomers adopt distinct conformations. *Elife* **7**, doi:10.7554/eLife.34271  
767 (2018).
- 768 9 Munro, J. B. *et al.* Conformational dynamics of single HIV-1 envelope trimers on the  
769 surface of native virions. *Science* **346**, 759-763, doi:10.1126/science.1254426 (2014).
- 770 10 Kwon, Y. D. *et al.* Crystal structure, conformational fixation and entry-related  
771 interactions of mature ligand-free HIV-1 Env. *Nat Struct Mol Biol* **22**, 522-531,  
772 doi:10.1038/nsmb.3051 (2015).
- 773 11 Wang, Q., Finzi, A. & Sodroski, J. The Conformational States of the HIV-1 Envelope  
774 Glycoproteins. *Trends in Microbiology* **28**, 655-667, doi:10.1016/j.tim.2020.03.007  
775 (2020).
- 776 12 Chojnacki, J. *et al.* Maturation-Dependent HIV-1 Surface Protein Redistribution  
777 Revealed by Fluorescence Nanoscopy. *Science* **338**, 524-528,  
778 doi:10.1126/science.1226359 (2012).
- 779 13 Su, L. *et al.* Identification of HIV-1 determinants for replication in vivo. *Virology*  
780 **227**, 45-52, doi:10.1006/viro.1996.8338 (1997).
- 781 14 Nakane, S., Iwamoto, A. & Matsuda, Z. The V4 and V5 Variable Loops of HIV-1  
782 Envelope Glycoprotein Are Tolerant to Insertion of Green Fluorescent Protein and  
783 Are Useful Targets for Labeling. *Journal of Biological Chemistry* **290**, 15279-15291,  
784 doi:10.1074/jbc.M114.628610 (2015).
- 785 15 Padilla-Parra, S., Auduge, N., Coppey-Moisan, M. & Tramier, M. Quantitative FRET  
786 analysis by fast acquisition time domain FLIM at high spatial resolution in living  
787 cells. *Biophys J* **95**, 2976-2988, doi:10.1529/biophysj.108.131276 (2008).
- 788 16 Auduge, N., Padilla-Parra, S., Tramier, M., Borghi, N. & Coppey-Moisan, M.  
789 Chromatin condensation fluctuations rather than steady-state predict chromatin  
790 accessibility. *Nucleic Acids Res* **47**, 6184-6194, doi:10.1093/nar/gkz373 (2019).

- 791 17 Peulen, T. O., Opanasyuk, O. & Seidel, C. A. M. Combining Graphical and  
792 Analytical Methods with Molecular Simulations To Analyze Time-Resolved FRET  
793 Measurements of Labeled Macromolecules Accurately. *Journal of Physical*  
794 *Chemistry B* **121**, 8211-8241, doi:10.1021/acs.jpcc.7b03441 (2017).
- 795 18 Weidtkamp-Peters, S. *et al.* Multiparameter fluorescence image spectroscopy to study  
796 molecular interactions. *Photochem Photobiol Sci* **8**, 470-480, doi:10.1039/b903245m  
797 (2009).
- 798 19 Padilla-Parra, S. & Tramier, M. FRET microscopy in the living cell: Different  
799 approaches, strengths and weaknesses. *Bioessays* **34**, 369-376,  
800 doi:10.1002/bies.201100086 (2012).
- 801 20 Padilla-Parra, S., Auduge, N., Coppey-Moisan, M. & Tramier, M. Non fitting based  
802 FRET-FLIM analysis approaches applied to quantify protein-protein interactions in  
803 live cells. *Biophys Rev* **3**, 63-70, doi:10.1007/s12551-011-0047-6 (2011).
- 804 21 Lu, M. L. *et al.* Associating HIV-1 envelope glycoprotein structures with states on the  
805 virus observed by smFRET. *Nature* **568**, 415+, doi:10.1038/s41586-019-1101-y  
806 (2019).
- 807 22 Padilla-Parra, S. *et al.* Fusion of Mature HIV-1 Particles Leads to Complete Release  
808 of a Gag-GFP-Based Content Marker and Raises the Intraviral pH. *Plos One* **8**,  
809 doi:10.1371/journal.pone.0071002 (2013).
- 810 23 Murakami, T., Ablan, S., Freed, E. O. & Tanaka, Y. Regulation of Human  
811 Immunodeficiency Virus Type 1 Env-Mediated Membrane Fusion by Viral Protease  
812 Activity. *Journal of Virology* **78**, 1026-1031, doi:10.1128/jvi.78.2.1026-1031.2004  
813 (2004).
- 814 24 Wyma, D. J. *et al.* Coupling of Human Immunodeficiency Virus Type 1 Fusion to  
815 Virion Maturation: a Novel Role of the gp41 Cytoplasmic Tail. *Journal of Virology*  
816 **78**, 3429-3435, doi:10.1128/jvi.78.7.3429-3435.2004 (2004).
- 817 25 Herschhorn, A. *et al.* Release of gp120 Restraints Leads to an Entry-Competent  
818 Intermediate State of the HIV-1 Envelope Glycoproteins. *mBio* **7**,  
819 doi:10.1128/mBio.01598-16 (2016).
- 820 26 Wang, H., Barnes, C. O., Yang, Z., Nussenzweig, M. C. & Bjorkman, P. J. Partially  
821 Open HIV-1 Envelope Structures Exhibit Conformational Changes Relevant for  
822 Coreceptor Binding and Fusion. *Cell Host Microbe* **24**, 579-592.e574,  
823 doi:10.1016/j.chom.2018.09.003 (2018).
- 824 27 Zhang, H. & Guo, P. Single molecule photobleaching (SMPB) technology for  
825 counting of RNA, DNA, protein and other molecules in nanoparticles and biological  
826 complexes by TIRF instrumentation. *Methods* **67**, 169-176,  
827 doi:10.1016/j.ymeth.2014.01.010 (2014).
- 828 28 Lee, J. H. *et al.* A Broadly Neutralizing Antibody Targets the Dynamic HIV Envelope  
829 Trimer Apex via a Long, Rigidified, and Anionic  $\beta$ -Hairpin Structure. *Immunity* **46**,  
830 690-702, doi:10.1016/j.immuni.2017.03.017 (2017).
- 831 29 Ozorowski, G. *et al.* Open and closed structures reveal allostery and pliability in the  
832 HIV-1 envelope spike. *Nature* **547**, 360-363, doi:10.1038/nature23010 (2017).
- 833 30 Liu, J., Bartesaghi, A., Borgnia, M. J., Sapiro, G. & Subramaniam, S. Molecular  
834 architecture of native HIV-1 gp120 trimers. *Nature* **455**, 109-113,  
835 doi:10.1038/nature07159 (2008).
- 836 31 Rantalainen, K. *et al.* HIV-1 Envelope and MPER Antibody Structures in Lipid  
837 Assemblies. *Cell Rep* **31**, 107583, doi:10.1016/j.celrep.2020.107583 (2020).
- 838 32 Yoon, H. *et al.* CATNAP: a tool to compile, analyze and tally neutralizing antibody  
839 panels. *Nucleic Acids Res* **43**, W213-219, doi:10.1093/nar/gkv404 (2015).

- 840 33 Flemming, J., Wiesen, L. & Herschhorn, A. Conformation-Dependent Interactions  
841 Between HIV-1 Envelope Glycoproteins and Broadly Neutralizing Antibodies. *AIDS*  
842 *Res Hum Retroviruses* **34**, 794-803, doi:10.1089/aid.2018.0102 (2018).
- 843 34 Witte, R., Andriasyan, V., Georgi, F., Yakimovich, A. & Greber, U. F. Concepts in  
844 Light Microscopy of Viruses. *Viruses* **10**, doi:10.3390/v10040202 (2018).
- 845 35 Park, J. K., Rowlands, C. J. & So, P. T. C. Enhanced Axial Resolution of Wide-Field  
846 Two-Photon Excitation Microscopy by Line Scanning Using a Digital Micromirror  
847 Device. *Micromachines (Basel)* **8**, doi:10.3390/mi8030085 (2017).
- 848 36 Godet, J. & Mély, Y. Exploring protein-protein interactions with large differences in  
849 protein expression levels using FLIM-FRET. *Methods Appl Fluoresc* **8**, 014007,  
850 doi:10.1088/2050-6120/ab5dd2 (2019).
- 851 37 Carravilla, P. *et al.* Molecular recognition of the native HIV-1 MPER revealed by  
852 STED microscopy of single virions. *Nat Commun* **10**, 78, doi:10.1038/s41467-018-  
853 07962-9 (2019).
- 854 38 Chen, Y. C. *et al.* Super-Resolution Fluorescence Imaging Reveals That Serine  
855 Incorporator Protein 5 Inhibits Human Immunodeficiency Virus Fusion by Disrupting  
856 Envelope Glycoprotein Clusters. *ACS Nano*, doi:10.1021/acsnano.0c02699 (2020).
- 857 39 Bjorkman, P. J. Can we use structural knowledge to design a protective vaccine  
858 against HIV-1? *Hla* **95**, 95-103, doi:10.1111/tan.13759 (2020).
- 859 40 Sougrat, R. *et al.* Electron tomography of the contact between T cells and SIV/HIV-1:  
860 implications for viral entry. *PLoS Pathog* **3**, e63, doi:10.1371/journal.ppat.0030063  
861 (2007).
- 862 41 Agrawal, P. *et al.* Stoichiometric Analyses of Soluble CD4 to Native-like HIV-1  
863 Envelope by Single-Molecule Fluorescence Spectroscopy. *Cell Rep* **29**, 176-186.e174,  
864 doi:10.1016/j.celrep.2019.08.074 (2019).

865

866

867

868

## 869 **Figure Legends**

870 **Figure 1. Two Photon FRET-FLIM detects HIV-1 Env conformations.** (A) Diagram representing the DNA  
871 sequence of the plasmids used to produce HXB2 pseudotyped virions. MA: matrix. GFP: green fluorescent  
872 protein. CA: capsid. NC: nucleocapsid. Protease cleavage sites are indicated by scissors symbol. (B) Schematic  
873 representation of HIV-1 immature (left) and mature (right) particles used in this assay. Immature particles  
874 possess the unprocessed Gag polyprotein fused to GFP. The viral protease cleaves Gag to mediate assembly of  
875 the mature HIV-1 virion. Few copies of HXB2 V4-GFP<sub>OPT</sub> embedded in the viral membrane allow analysis of  
876 Env conformations by FRET-FLIM and single-molecule approaches. (C) The HIV-1 Env structure representing  
877 closed Env (PBD ID 5T3X) conformation was modified to illustrate the labeling of the V4 loop with GFP<sub>OPT</sub>  
878 and NbA488 and NbA594. (D-E) Two-dimensional (2D) kernel probability graphs showing FRET (FRET  
879 efficiency,  $E_{app}$ ) vs FLIM (Lifetime, in ps) data. High density regions are depicted in darker grey color. (D) Plots  
880 corresponding to HIV-1 mature HXB2 V4-GFP<sub>OPT</sub> labelled with NbA488 and NbA594 nanobodies incubated  
881 without (left) or with (right) sCD4. (E) Plots corresponding to HIV-1 immature HXB2 V4-GFP<sub>OPT</sub> labelled with  
882 NbA488 and NbA594 nanobodies incubated without (left) or with (right) 10  $\mu$ g/mL concentration of soluble  
883 CD4 (sCD4<sub>D1-D4</sub>).

884 **Figure 2. Single-molecule step photobleaching shows differential distribution of HIV-1 Env in mature vs**  
885 **immature HXB2 V4-GFP<sub>OPT</sub> pseudotyped virions.** (A) Schematic representation of the single-molecule step  
886 photobleaching approach. Photobleaching of the Atto 594 fluorophore labelling HXB2 V4-GFP<sub>OPT</sub> was induced  
887 by continuous laser 594 nm excitation in mature and immature HIV-1 particles. In case of mature HIV-1 virions,  
888 photobleaching of labelled Env is more frequent and faster, suggesting a cluster-like distribution within the viral  
889 membrane, as opposed to immature particles, in which photobleaching is less frequent and slower, suggesting a  
890 more homogeneous distribution of Env. (B) Representative intensity traces for HIV-1 mature (left) and  
891 immature (right) HXB2 V4-GFP<sub>OPT</sub> particles. Arrows point to single photobleaching steps detected. (C)  
892 Population histograms calculated from intensity traces were fitted into a multi-Gaussian distribution model to  
893 estimate the number of photobleaching steps for mature (left chart) and immature (right chart) viral particles.  $X^2$   
894 values report the goodness of the fit. (D) Bar graph showing the mean and SD of the number of photobleaching  
895 events quantified from intensity traces. N of intensity traces is indicated on each bar per condition. Statistical  
896 significance was calculated using a one-way ANOVA and Sidak pos-hoc test comparing each condition to the  
897 mature HIV-1 HXB2 V4-GFP<sub>OPT</sub> condition in absence of sCD4. \*\*\*\*  $< 0.0001$ ; ns = non- statistically  
898 significant (E) Cumulative distribution calculated from the mean intensity trace histograms. Statistical  
899 significance was calculated using a Kolmogorov-smirnov test comparing each condition to the mature HIV-1  
900 HXB2 V4-GFP<sub>OPT</sub> condition in absence of sCD4. \*\*  $< 0.01$ ; \*\*\*\*  $< 0.0001$ .

901 **Figure 3. Intermolecular conformations of HIV-1 JR-FL Env are maturation-dependent and modulated**  
902 **by sCD4 and neutralizing antibodies.** (A) Schematic representation of sample preparation for the single-  
903 molecule step photobleaching approach. Mature (-SQV) or immature (+SQV) HIV-1 particles were incubated in  
904 presence or absence of sCD4 and revealed by immunostaining with anti-gp120 b12 and anti-human A633  
905 antibodies. Photobleaching of the Alexa 633 fluorophore labelling HXB2 V4-GFP<sub>OPT</sub> was induced by  
906 continuous laser 633 nm excitation. (B) Representative intensity trace of HIV-1 mature JR-FL Env (left) and its  
907 corresponding population histogram (right) calculated from intensity traces. Data were fitted into a multi-  
908 Gaussian distribution model to estimate the number of photobleaching steps. Arrows point to single  
909 photobleaching steps detected.  $X^2$  values report the goodness of the fit. (C) Bar graph showing the mean and SD  
910 of the number of photobleaching events quantified from intensity traces. N of intensity traces is indicated on  
911 each bar per condition. Statistical significance was calculated using a one-way ANOVA and Sidak pos-hoc test  
912 comparing each condition to the mature HIV-1 JR-FL condition in absence of sCD4. \*\*\*\*  $< 0.0001$ ; \*\*\*  $<$   
913  $0.001$ ; \*  $< 0.05$ . (D) Cumulative distribution calculated from the mean intensity trace histograms from viral  
914 particles per condition. Statistical significance was calculated using a Kolmogorov-smirnov test comparing each  
915 condition to the mature HIV-1 JR-FL condition in absence of sCD4. \*\*\*\*  $< 0.0001$ ; \*\*\*  $< 0.001$ ; \*\*  $< 0.01$ ; \*  $<$   
916  $0.05$ . (E) Schematic representation of sample preparation for the single-molecule step photobleaching approach.  
917 Mature HIV-1 particles were incubated in presence or absence of neutralizing antibodies 10E8, b12, PGT145  
918 targeting Env and revealed by anti-human A633 antibodies. Photobleaching of the Alexa 633 fluorophore  
919 labelling HXB2 V4-GFP<sub>OPT</sub> was induced by continuous laser 633 nm excitation. (F) Analysis as in (C). (G)  
920 Analysis as in (D).

921 **Figure 4. Intermolecular conformations of HIV-1 NL4-3 Env are maturation-dependent and modulated**  
922 **by sCD4 and neutralizing antibodies.** (A) Representative intensity trace of HIV-1 mature NL4-3 Env (left)

923 and its corresponding population histogram (right) calculated from intensity traces. Data were fitted into a multi-  
924 Gaussian distribution model to estimate the number of photobleaching steps.  $X^2$  values report the goodness of  
925 the fit. Arrows point to single photobleaching steps detected. (B) Bar graph showing the mean and SD of the  
926 number of photobleaching events quantified from intensity traces. N of intensity traces is indicated on each bar  
927 per condition. Statistical significance was calculated using a one-way ANOVA and Sidak pos-hoc test  
928 comparing each condition to the mature HIV-1 JR-FL condition in absence of sCD4. \*\*\*\*  $< 0.0001$ . (C)  
929 Cumulative distribution calculated from the mean intensity trace histograms. Statistical significance was  
930 calculated using a Kolmogorov-smirnov test comparing each condition to the mature HIV-1 NL4-3 condition in  
931 absence of sCD4. \*\*\*\*  $< 0.0001$ ; \*\*  $< 0.01$ ; \*  $< 0.05$ . (D) Analysis as in (B) for HIV-1 NL4-3 Env mature  
932 virions incubated in absence or presence of neutralizing antibodies 10E8, b12 or PGT145. (E) Analysis as in (C)  
933 for HIV-1 NL4-3 Env mature virions incubated in absence or presence of neutralizing antibodies 10E8, b12 or  
934 PGT145.

935 **Figure 5. HIV-1 Env cluster is destabilized when engaged in the pre-fusion reaction in live T cells.** (A)  
936 Micrograph showing mature HIV-1 HXB2 V4-GFP<sub>OPT</sub> virions labelled with NbA488 (green) NbA594 (red)  
937 engaged in the pre-fusion reaction onto living MT4 T cells (phase contrast). Scale bar image on the left is 5  $\mu\text{m}$ .  
938 Magnification of the region indicated by dashed lines is shown on the right. Viral particle showing  
939 colocalization between green and red channels is shown on the upper right panel. Middle and bottom right  
940 panels correspond to the same viral particle as observed in green and red channels, respectively. Scale bar  
941 magnification is 2  $\mu\text{m}$ . (B) Graphs represent FRET efficiency ( $E_{\text{app}}$ ) (upper panel) and lifetime (in ps, bottom  
942 panel) traces over time. High FRET efficiency burst ( $E_{\text{app}} > 0.23$ ), defining intermolecular interactions is  
943 depicted in red; intermediate FRET efficiency regime ( $0.12 < E_{\text{app}} < 0.23$ ) assigned to closed Env conformations  
944 is depicted in green, and low FRET efficiency bursts ( $E_{\text{app}} < 0.12$ ) reporting open Env conformations is depicted  
945 in blue. Note that high FRET efficiency correlates with low lifetime values and *vice versa*. (C) Cumulative  
946 Distribution Functions (CDF) are plotted for  $E_{\text{app}}$  single traces obtained from at least ( $n = 20$ ) HIV-1 HXB2 V4-  
947 GFP<sub>OPT</sub> virions *in vitro* (open dots) and in presence of living T cells (solid dots). Each FRET regime determines  
948 the Env conformational state and kinetics. (D) Analysis as in (C) of HIV-1 HXB2 V4-GFP<sub>OPT</sub> virions *in vitro*  
949 (open dots) and in presence of sCD4 (solid squares).

950 **Figure 6. HIV-1 Env cluster is destabilized when exposing virions to neutralizing antibodies in live T cells.**  
951 Cumulative Distribution Functions (CDF) are plotted for FRET efficiency traces obtained from at least ( $n = 20$ )  
952 HIV-1 HXB2 V4-GFP<sub>OPT</sub> virions in presence of living T cells without (solid dots) or with (solid triangles)  
953 neutralizing antibodies PGT145 (A), b12 (B) and 10E8 (C). Each FRET regime (high,  $E_{\text{app}} > 0.23$  in red;  
954 intermediate,  $0.12 < E_{\text{app}} < 0.23$ , in green; low,  $E_{\text{app}} < 0.12$ , in blue) determines the Env conformational state and  
955 kinetics. (D) The HIV-1 Env structures representing closed Env associated with PGT145 (PBD ID 6NIJ, left),  
956 b12 (PBD ID 5VN8, middle) or 10E8 (PBD ID 5VN3, right) were modified to illustrate the labeling of the V4  
957 loop with GFP<sub>OPT</sub>.

958 **Figure 7. HIV-1 Env transitions between intra- and intermolecular conformations are disrupted by CD4-  
959 binding and bNAbs.** Schematic representation of the transitions between different intra- (open, showing low/no  
960 FRET, upper panel; closed, showing moderate FRET, middle panel) and intermolecular (cluster, showing high  
961 FRET bottom panel) env conformations observed by FRET-FLIM. Receptor binding (sCD4<sub>D1-D2</sub> or CD4 on T  
962 cells) and binding of b12 and 10E8 bNAbs stabilize and intermediate or open conformation, whereas PGT145  
963 favours a closed conformation. Engagement of Env with CD4 or with any of bNAbs tested increases the  
964 distance between Env molecules, inducing cluster dissociation.

965 **Figure S1. Efficiency of labelling and maturation of HXB2 V4-GFP<sub>OPT</sub> virions.** (A) Micrograph showing the  
966 labelling efficiency of HIV-1 pseudoviruses expressing Gag-GFP and HXB2 V4-GFP<sub>OPT</sub> (green) labelled with  
967 Atto 594 (red). Colocalisation (GFP+ Atto 594+, yellow particles) represents efficient labelling of virions. Scale  
968 bar 5  $\mu\text{m}$ . (B) Bar graph showing the number of mature and immature virions in viral samples prepared in  
969 absence (-) or presence of saquinavir (SQV) treatment. (C) Single particle tracking of mature (upper panel) and  
970 immature virions (bottom panel) upon saponin-induced membrane permeabilization. The micrograph on the left  
971 shows a double labelled HIV-1 mature particle (GFP+ Atto 594+) releasing the GFP content at  $\sim 240$  s after  
972 saponin addition, as observed by a drop in green fluorescence intensity (right chart, upper panel). Membrane  
973 permeabilization in immature HIV-1 particles instead allows access to uncleaved Gag-GFP by NbA594, judged  
974 by an increase in red fluorescent intensity at  $\sim 200$  s after saponin addition (right chart, bottom panel). Scale bar  
975 5  $\mu\text{m}$ . A.U.: arbitrary units.

976 **Figure S2. FRET negative controls for intramolecular and intermolecular HIV-1 Env conformations.**  
977 Two-dimensional (2D) kernel probability graphs showing FRET (FRET efficiency,  $E_{\text{app}}$ ) vs FLIM (Lifetime, in

978 ps) data. (A-B) HXB2 V4-GFP<sub>OPT</sub> bearing Gag-GFP labelled without (left charts) or with (right charts) NbA488.  
979 Addition of the donor fluorophore, NbA488, induces a shift towards longer lifetimes, allowing both, to identify  
980 double labelled (A) mature and (B) immature particles (GFP+ NbA488+), and to define the negative signal for  
981 intramolecular FRET interactions (C-D) HXB2 V1-GFP<sub>OPT</sub> virions bearing Gag-GFP labelled with the donor  
982 dipole, NbA488, in absence (left charts) or in presence of the acceptor dipole, NbA594 (right charts). Addition  
983 of NbA594, induces a shift towards higher FRET efficiencies in both, (C) mature and (D) immature particles  
984 below 0.23, which determines the threshold for intermolecular interactions observed in gp120 V4-labelled  
985 virions.

986 **Figure S3. Single-molecule step photobleaching of HIV-1 Env in mature vs immature HXB2 V4-GFP<sub>OPT</sub>**  
987 **pseudotyped virions in presence of sCD4.** (A) Representative intensity traces for HIV-1 mature (left) and  
988 immature (right) HXB2 V4-GFP<sub>OPT</sub> particles. Arrows point to single photobleaching steps detected. (B)  
989 Population histograms calculated from intensity traces were fitted into a multi-Gaussian distribution model to  
990 estimate the number of photobleaching steps for mature (left chart) and immature (right chart) viral particles.  $X^2$   
991 values report the goodness of the fit.

992 **Figure S4. Single-molecule step photobleaching of HIV-1 JR-FL Env in mature vs immature virions in**  
993 **presence of sCD4 or neutralizing antibodies.** (A) Representative intensity traces for HIV-1 mature (left) and  
994 immature (middle and right) HIV-1 JR-FL particles and the corresponding population histograms calculated  
995 from intensity traces. Histograms were fitted into a multi-Gaussian distribution model to estimate the number of  
996 photobleaching steps for mature (left chart) and immature (middle and right charts) viral particles in presence or  
997 absence of sCD4.  $X^2$  values report the goodness of the fit. Arrows point to single photobleaching steps. (B)  
998 Analysis as in (A) of HIV-1 mature JR-FL Env virions in presence of neutralizing antibodies PGT145, b12 and  
999 10E8, targeting different regions of the Env glycoprotein.

1000 **Figure S5. Single-molecule step photobleaching of HIV-1 NL4-3 Env in mature vs immature virions in**  
1001 **presence of sCD4 or neutralizing antibodies.** (A) Representative intensity traces for HIV-1 mature in presence  
1002 of sCD4 (left) and immature in absence of sCD4 (right) HIV-1 NL4-3 particles and the corresponding  
1003 population histograms calculated from intensity traces. Histograms were fitted into a multi-Gaussian distribution  
1004 model to estimate the number of photobleaching steps for mature (left chart) and immature (right chart) viral  
1005 particles.  $X^2$  values report the goodness of the fit. Arrows point to single photobleaching steps. (B) Analysis as  
1006 in (A) of HIV-1 mature NL4-3 Env virions in presence of neutralizing antibodies PGT145, b12 and 10E8,  
1007 targeting different regions of the Env glycoprotein.

1008

1009

# Fig 1

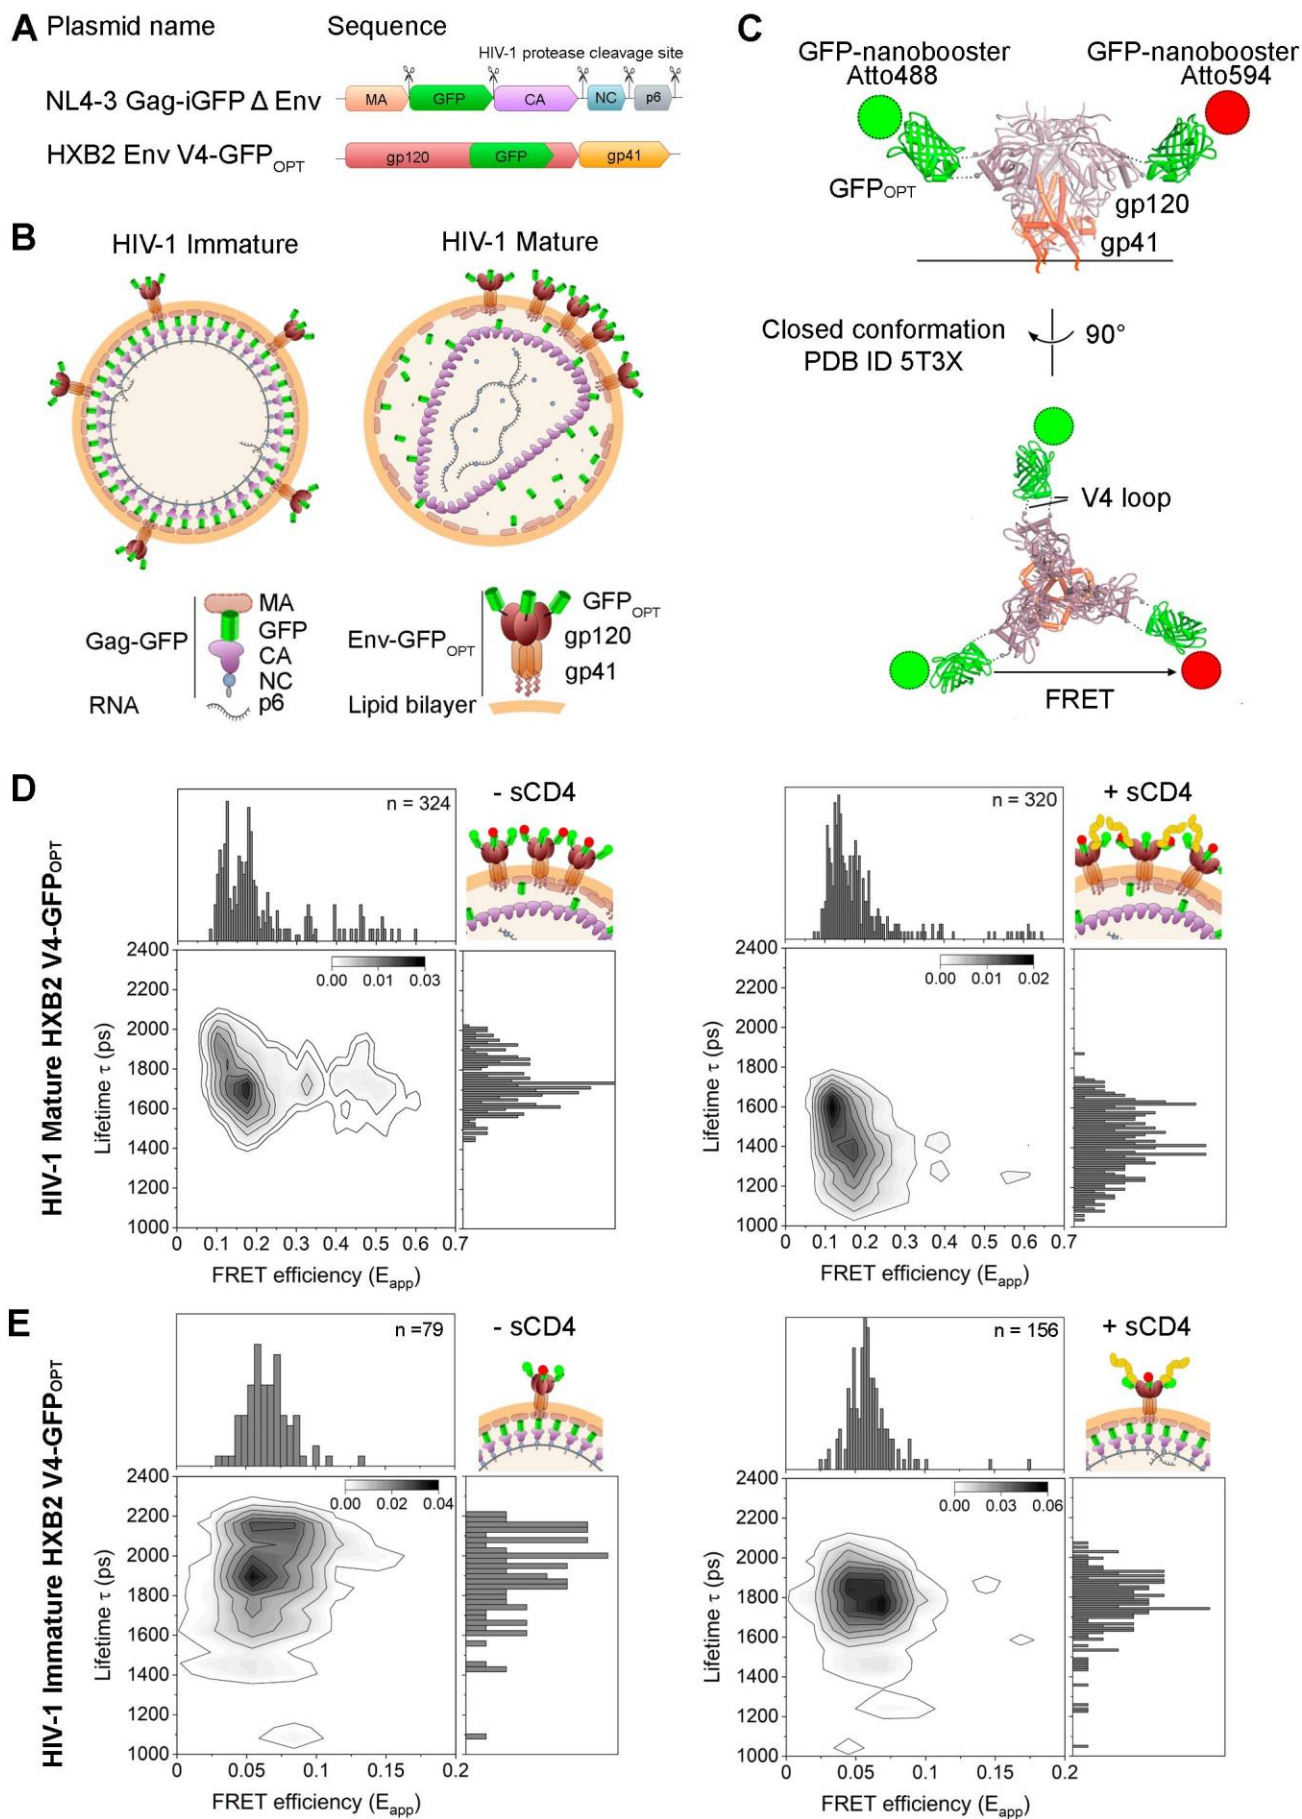



# Fig S1

**A** HIV-1 Gag-GFP HXB2 V4-GFP<sub>OPT</sub>  
NB Atto 594

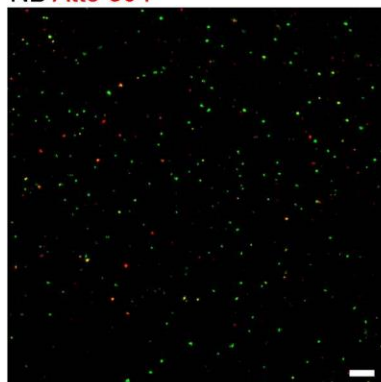

|                      |          |
|----------------------|----------|
| Labelling efficiency | 32.7%    |
| GFP+ Atto 594+       | n = 378  |
| GFP+                 | n = 1155 |

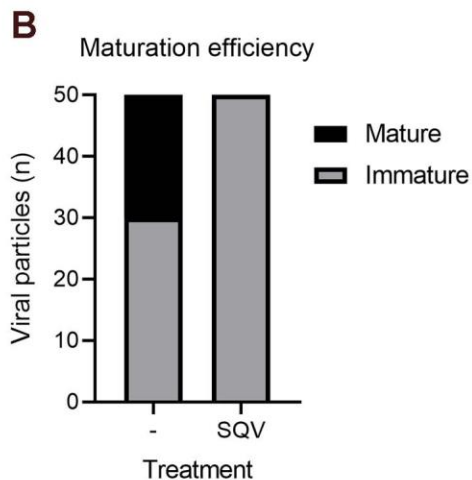

**C**

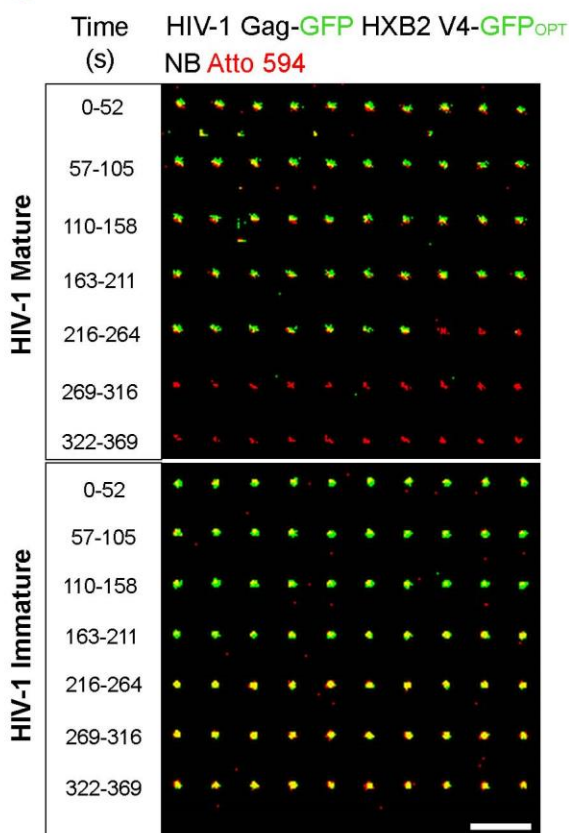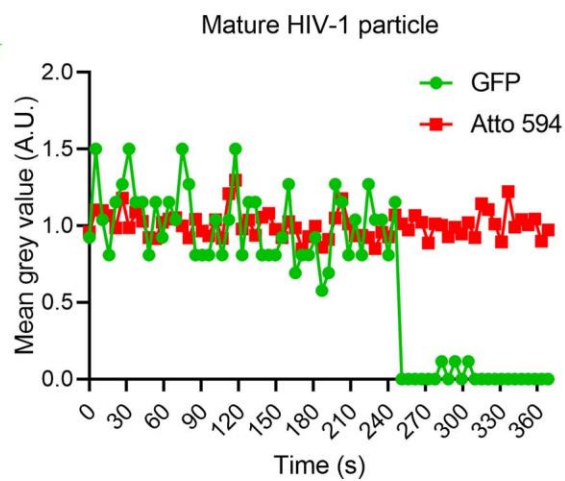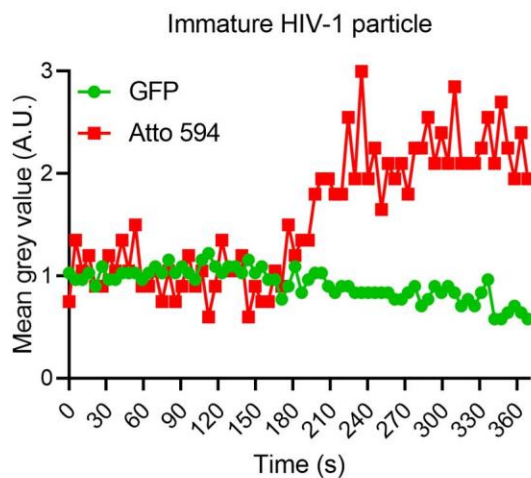

## Fig S2

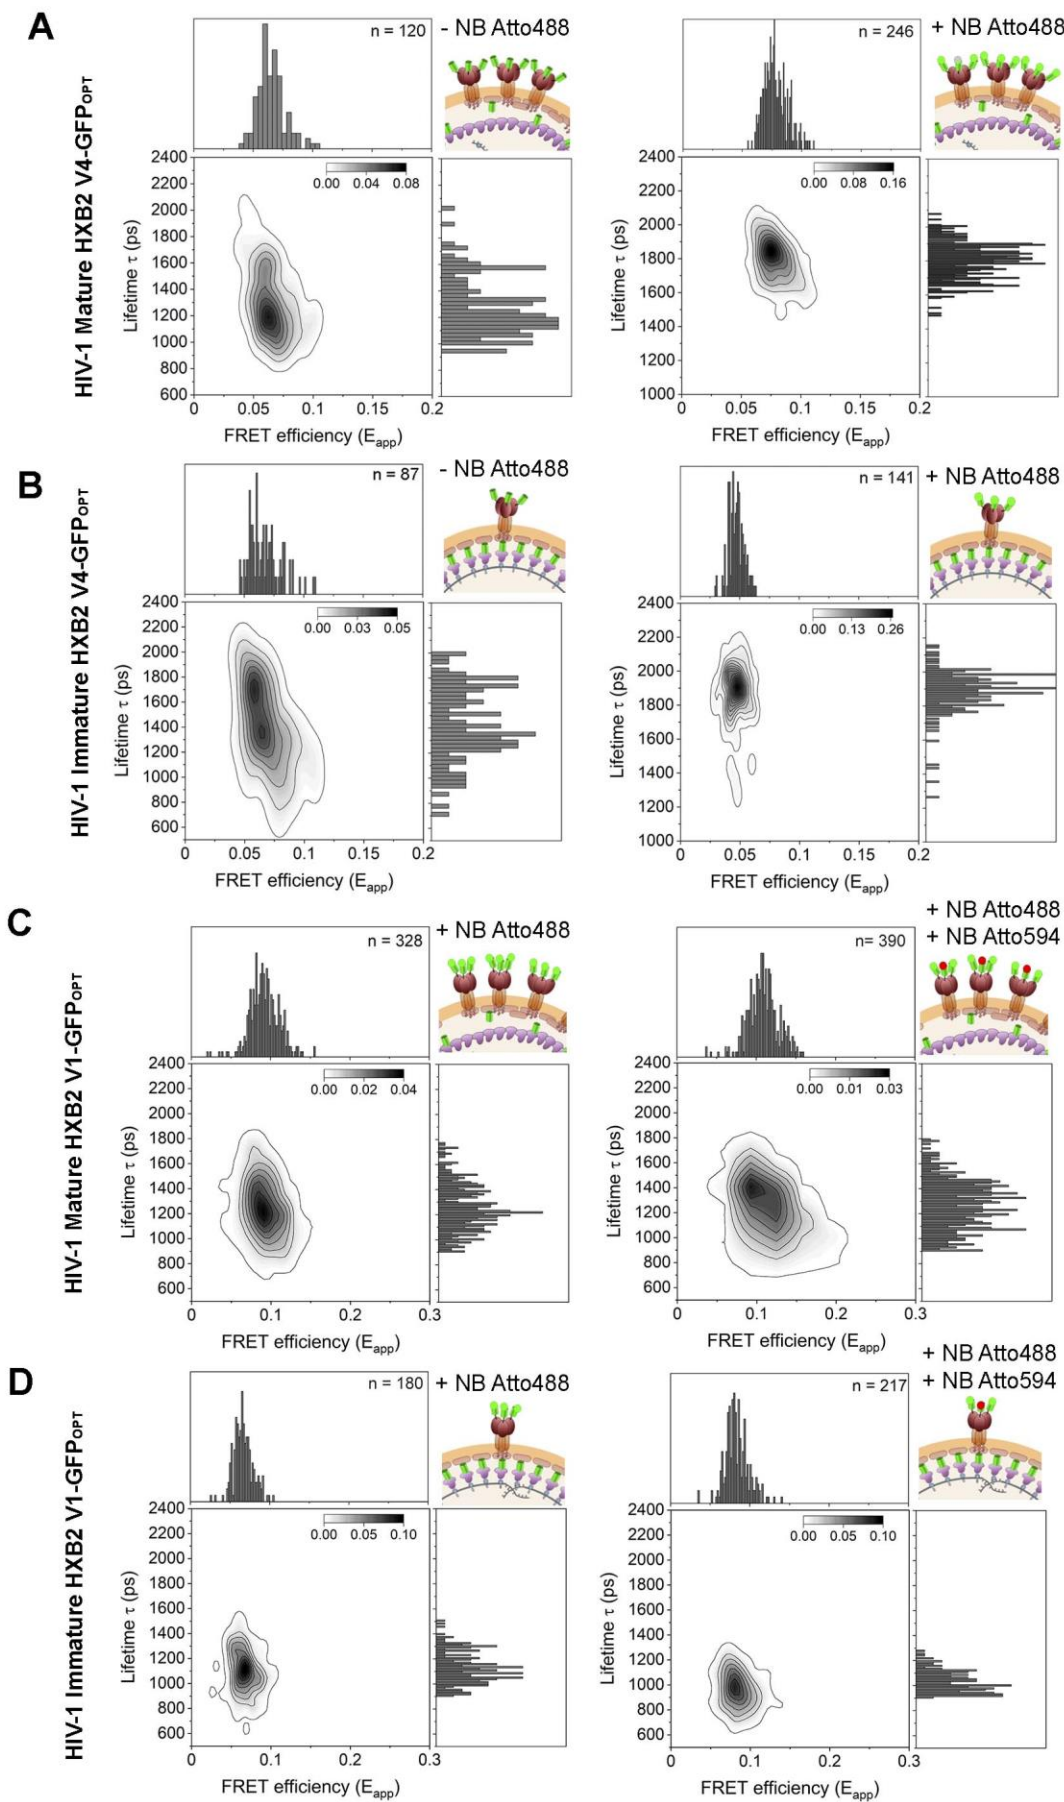

## Fig 2

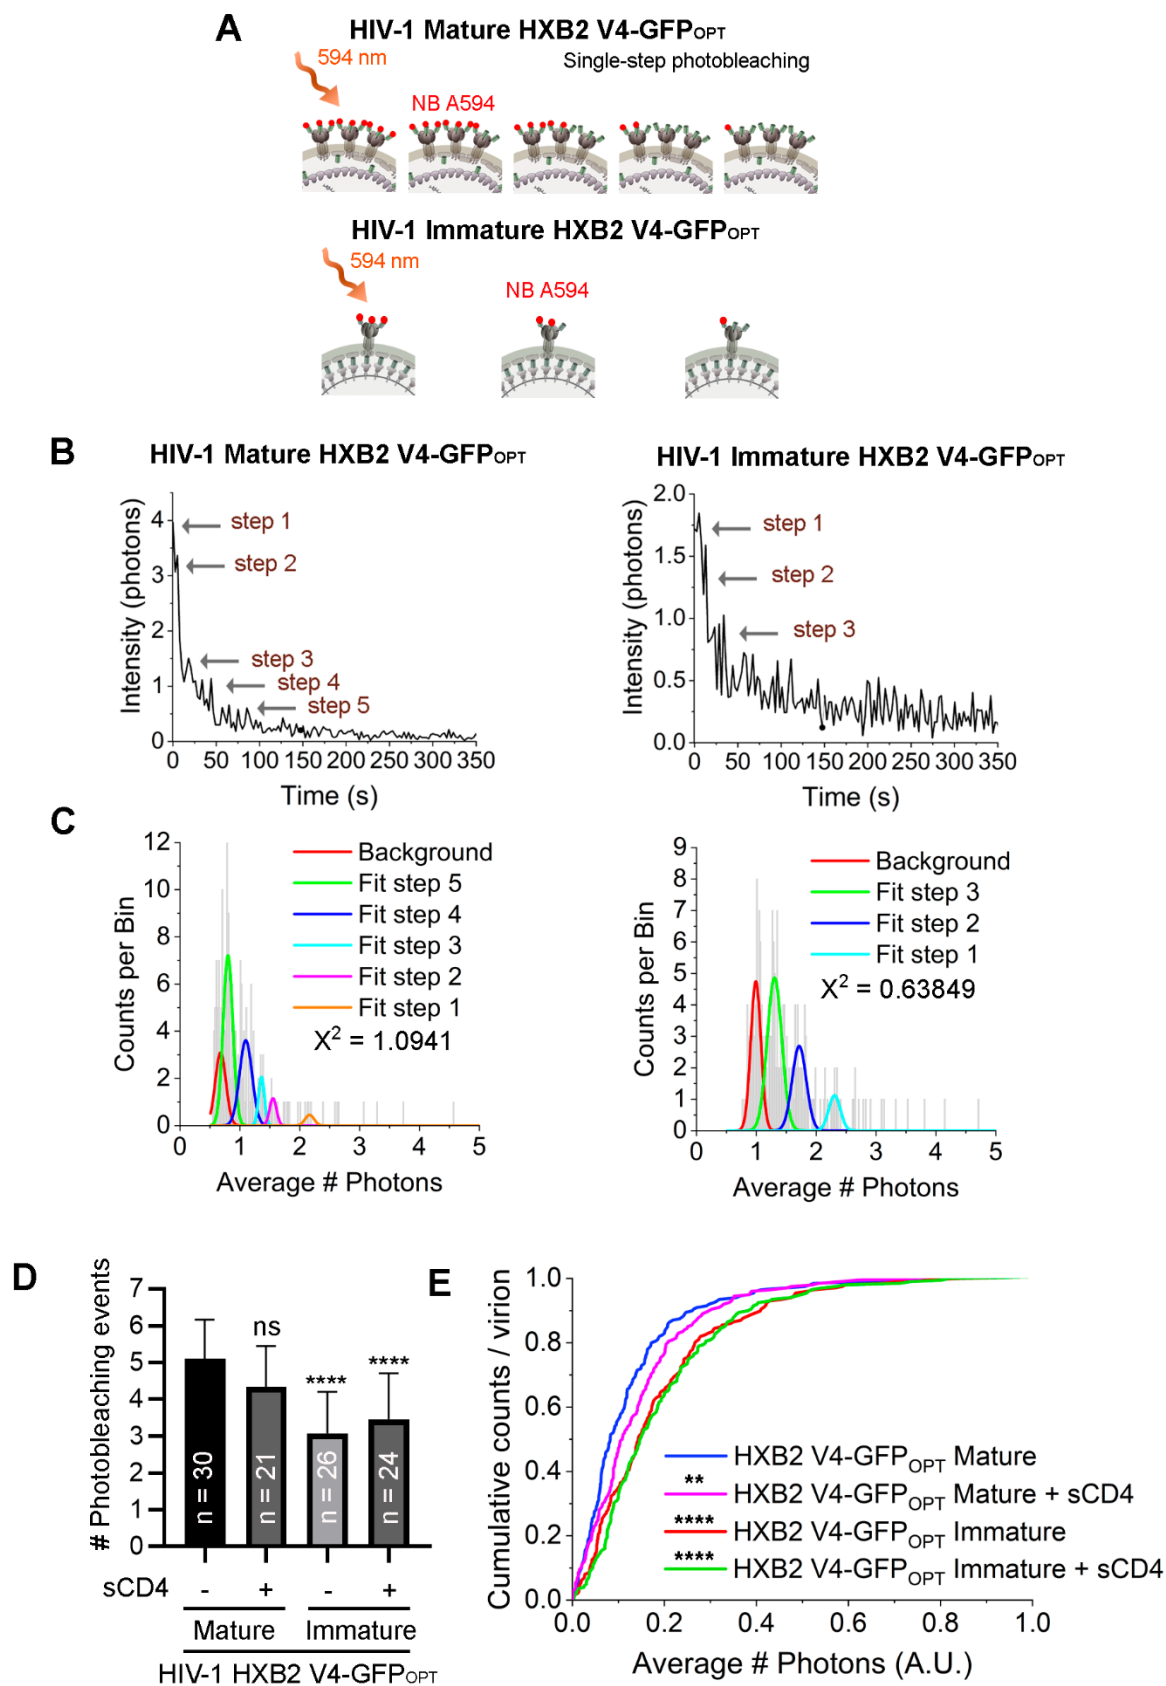

## Fig S3

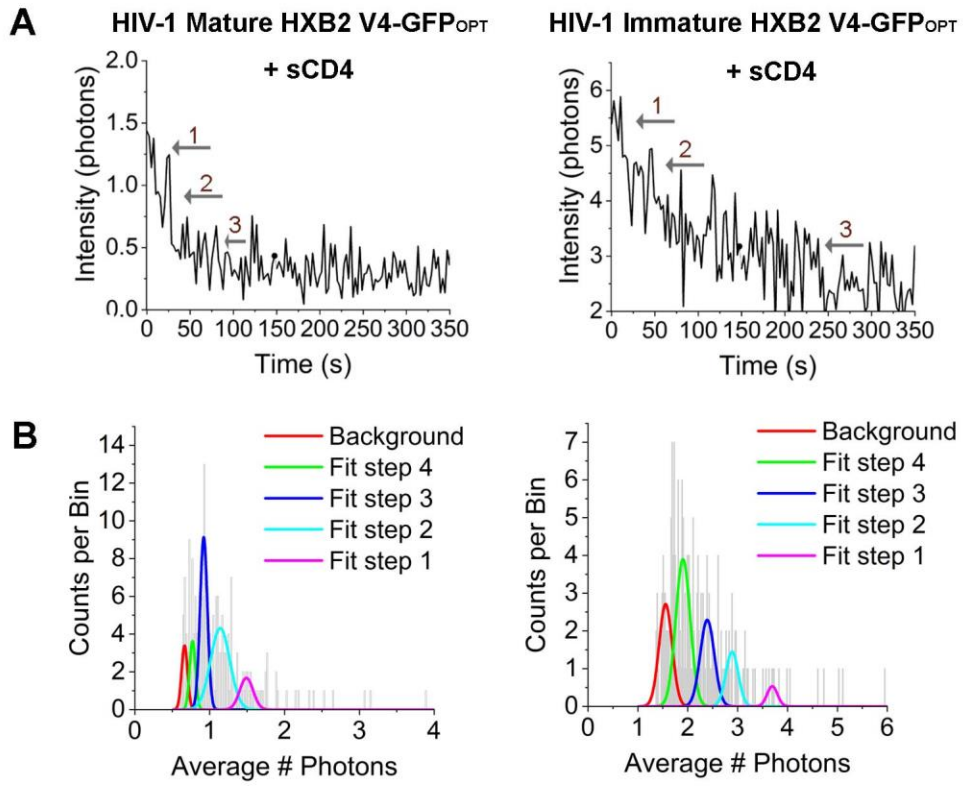

### Fig 3

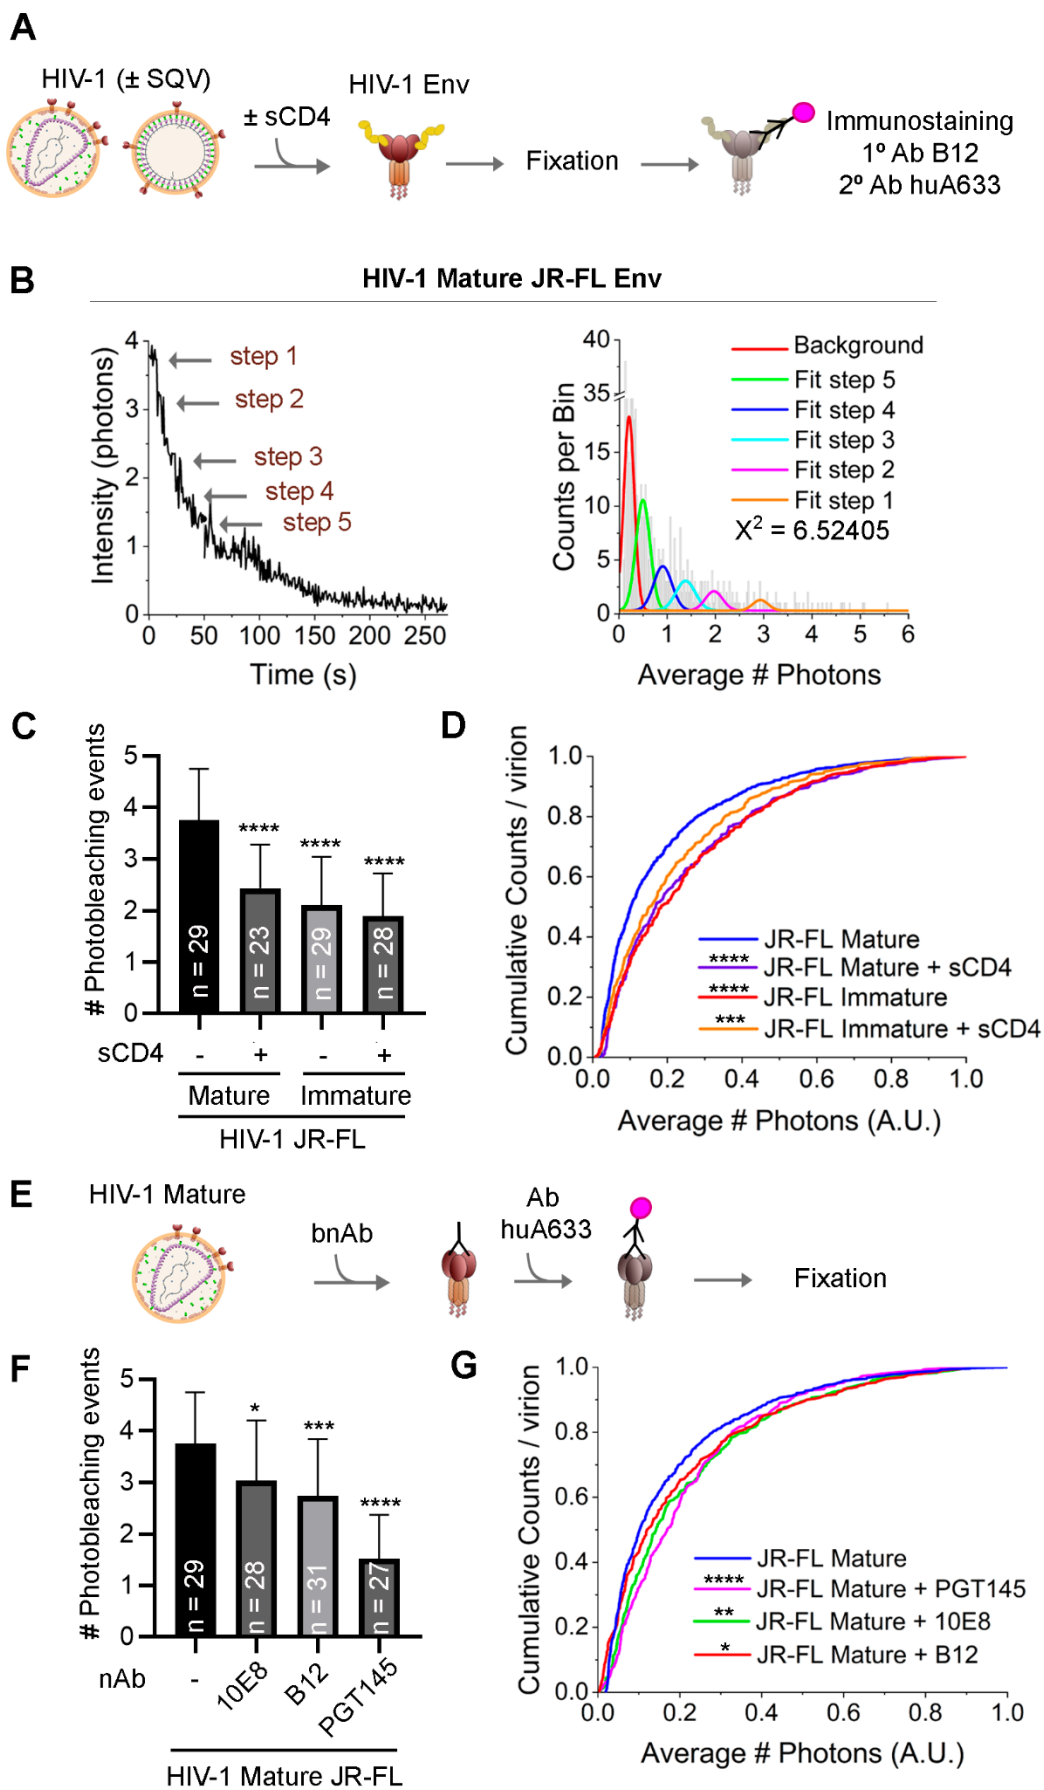

## Fig S4

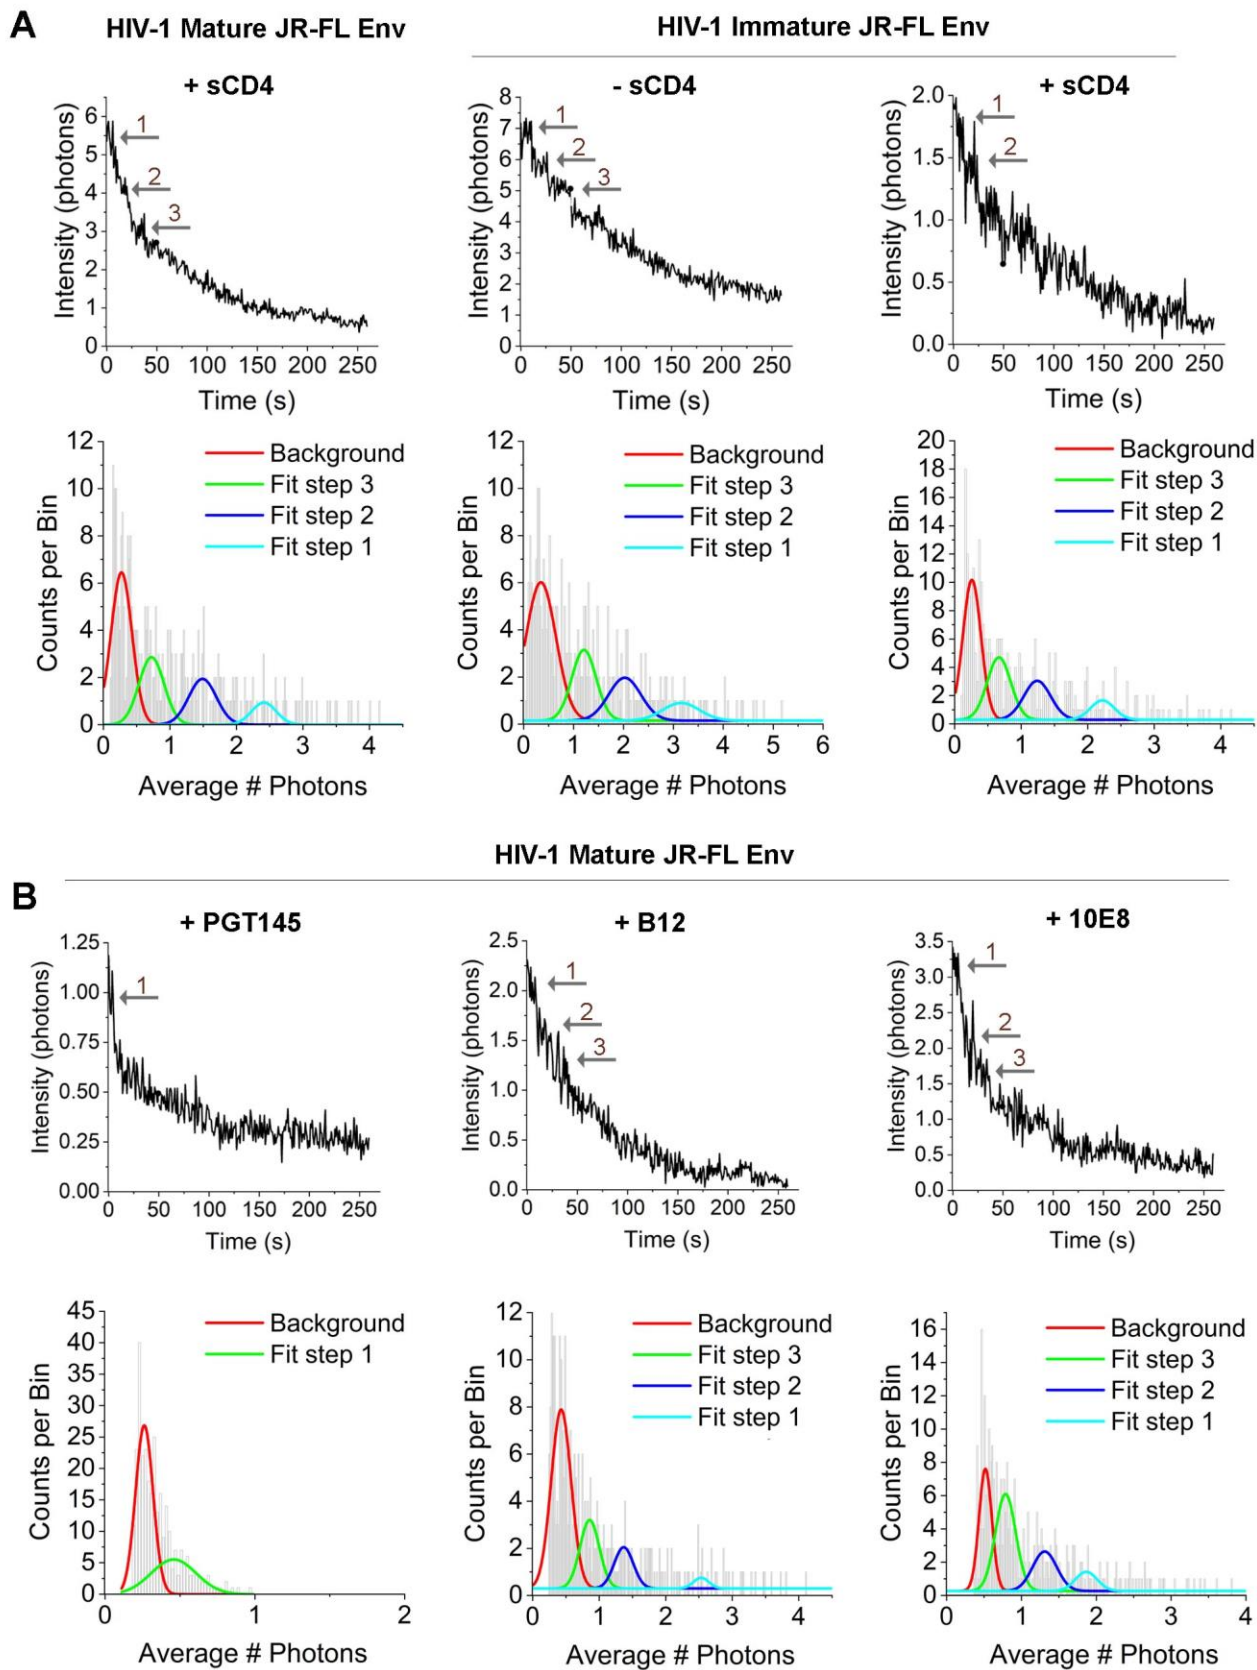

## Fig 4

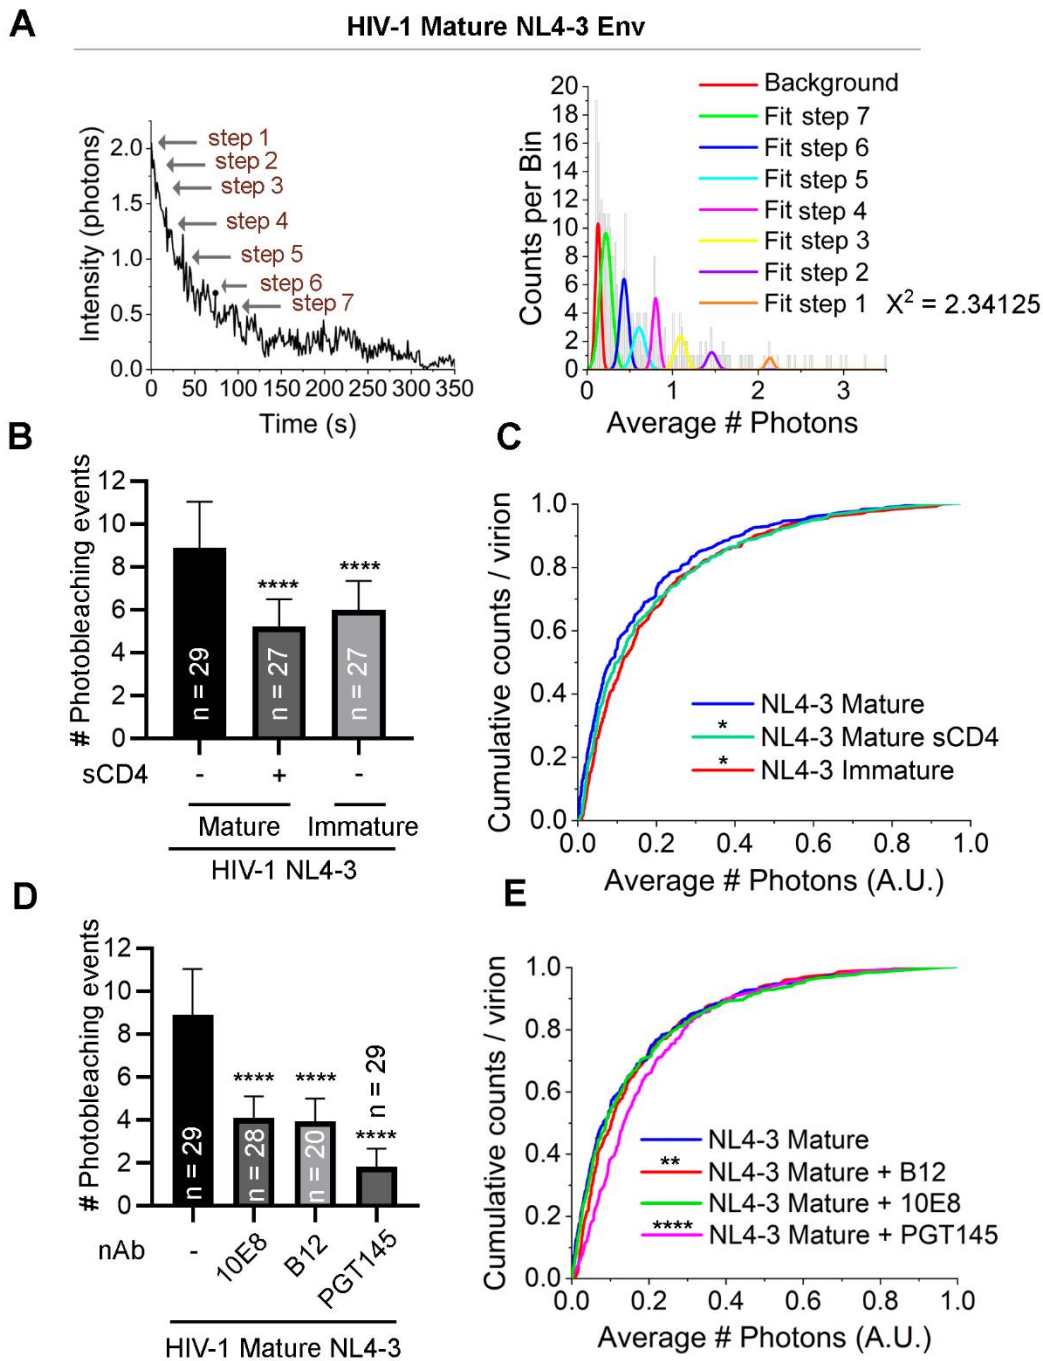

# Fig S5

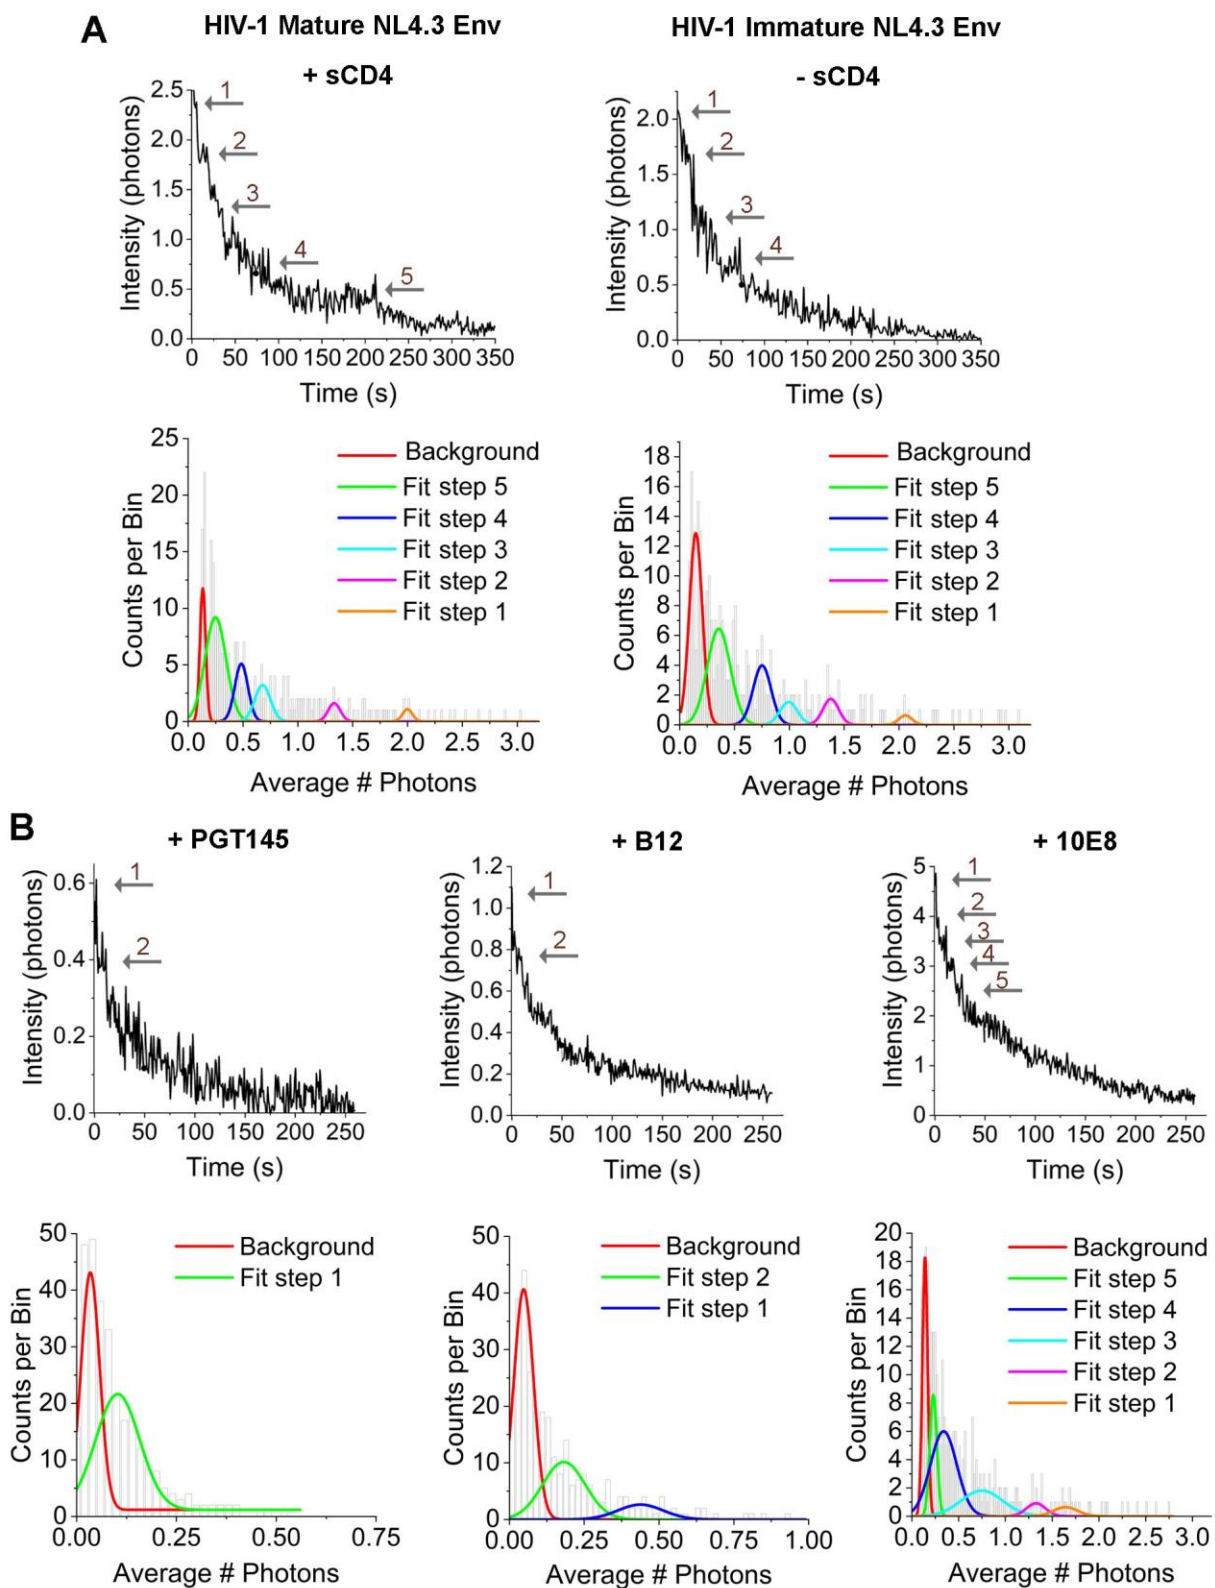



## Fig 5

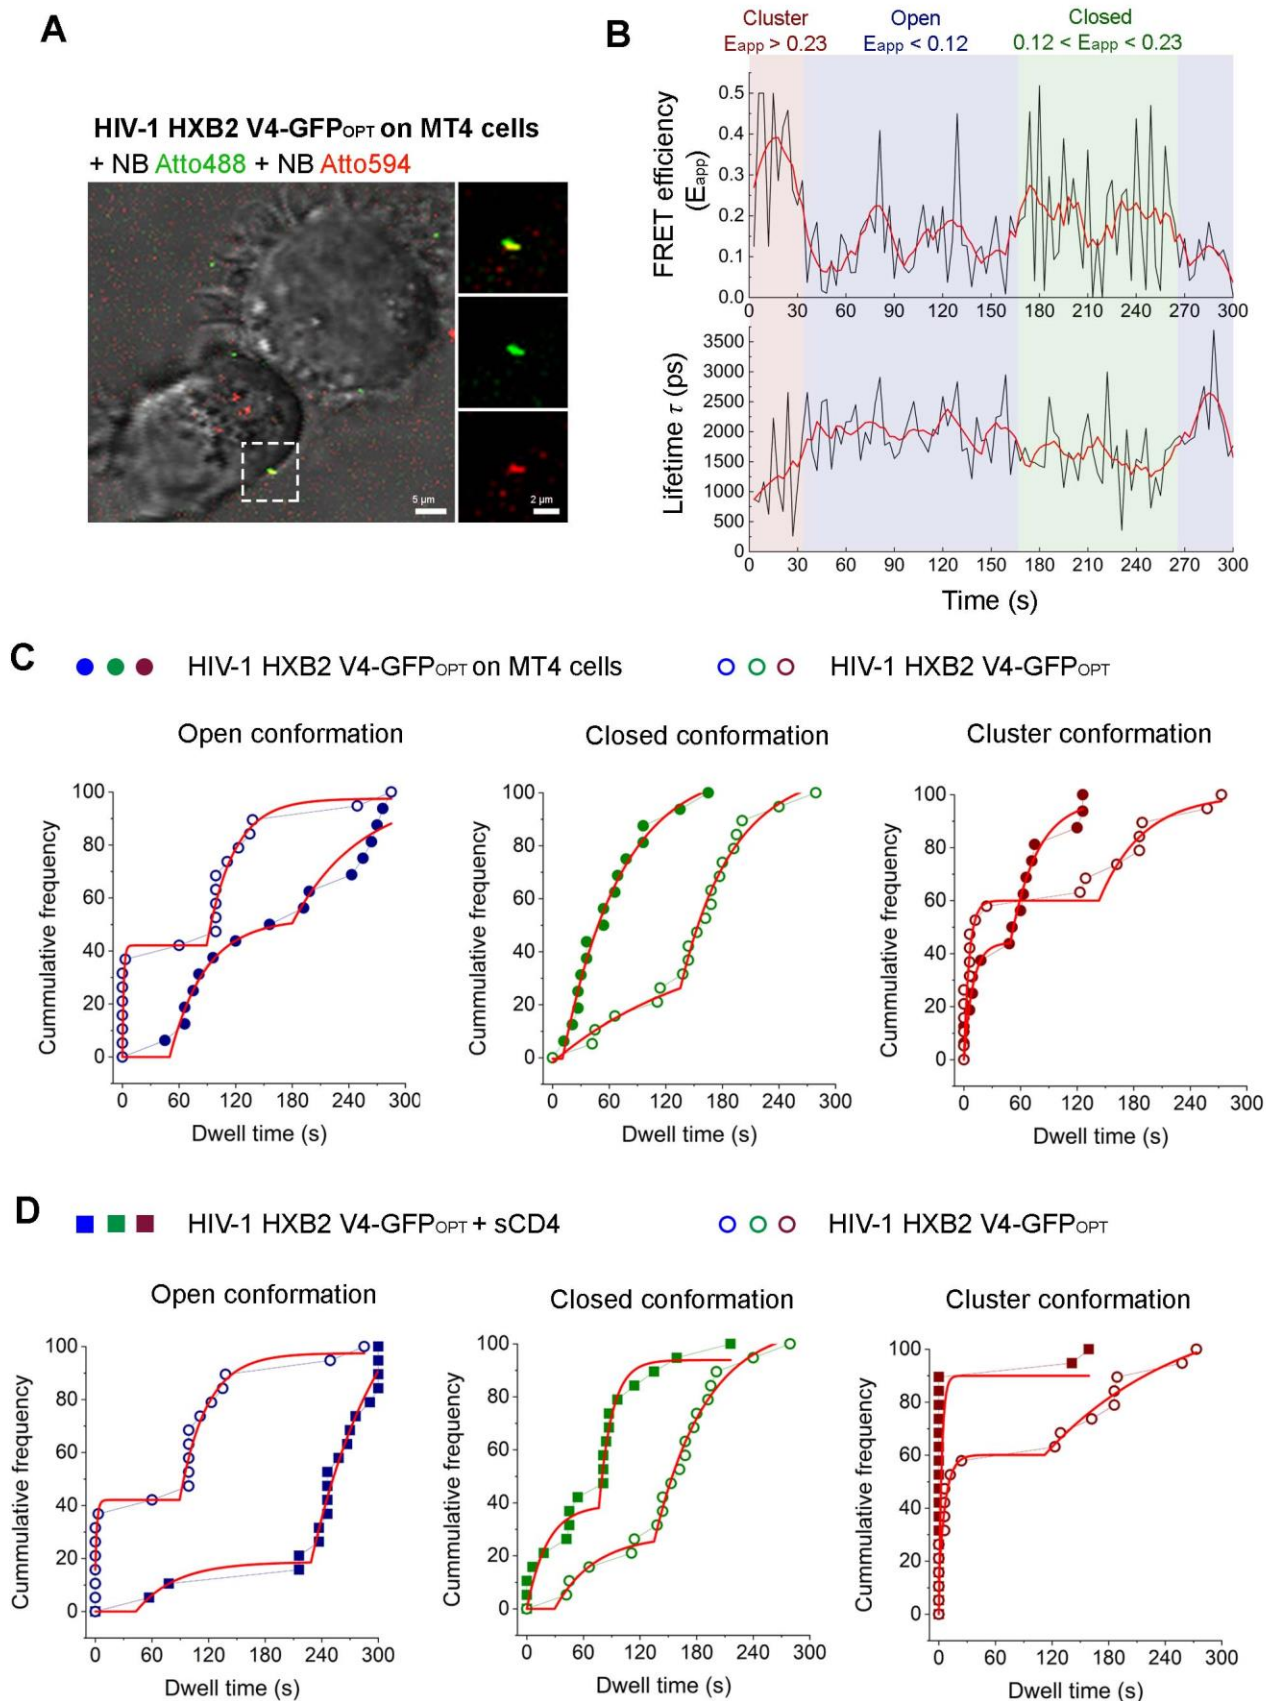

## Fig 6

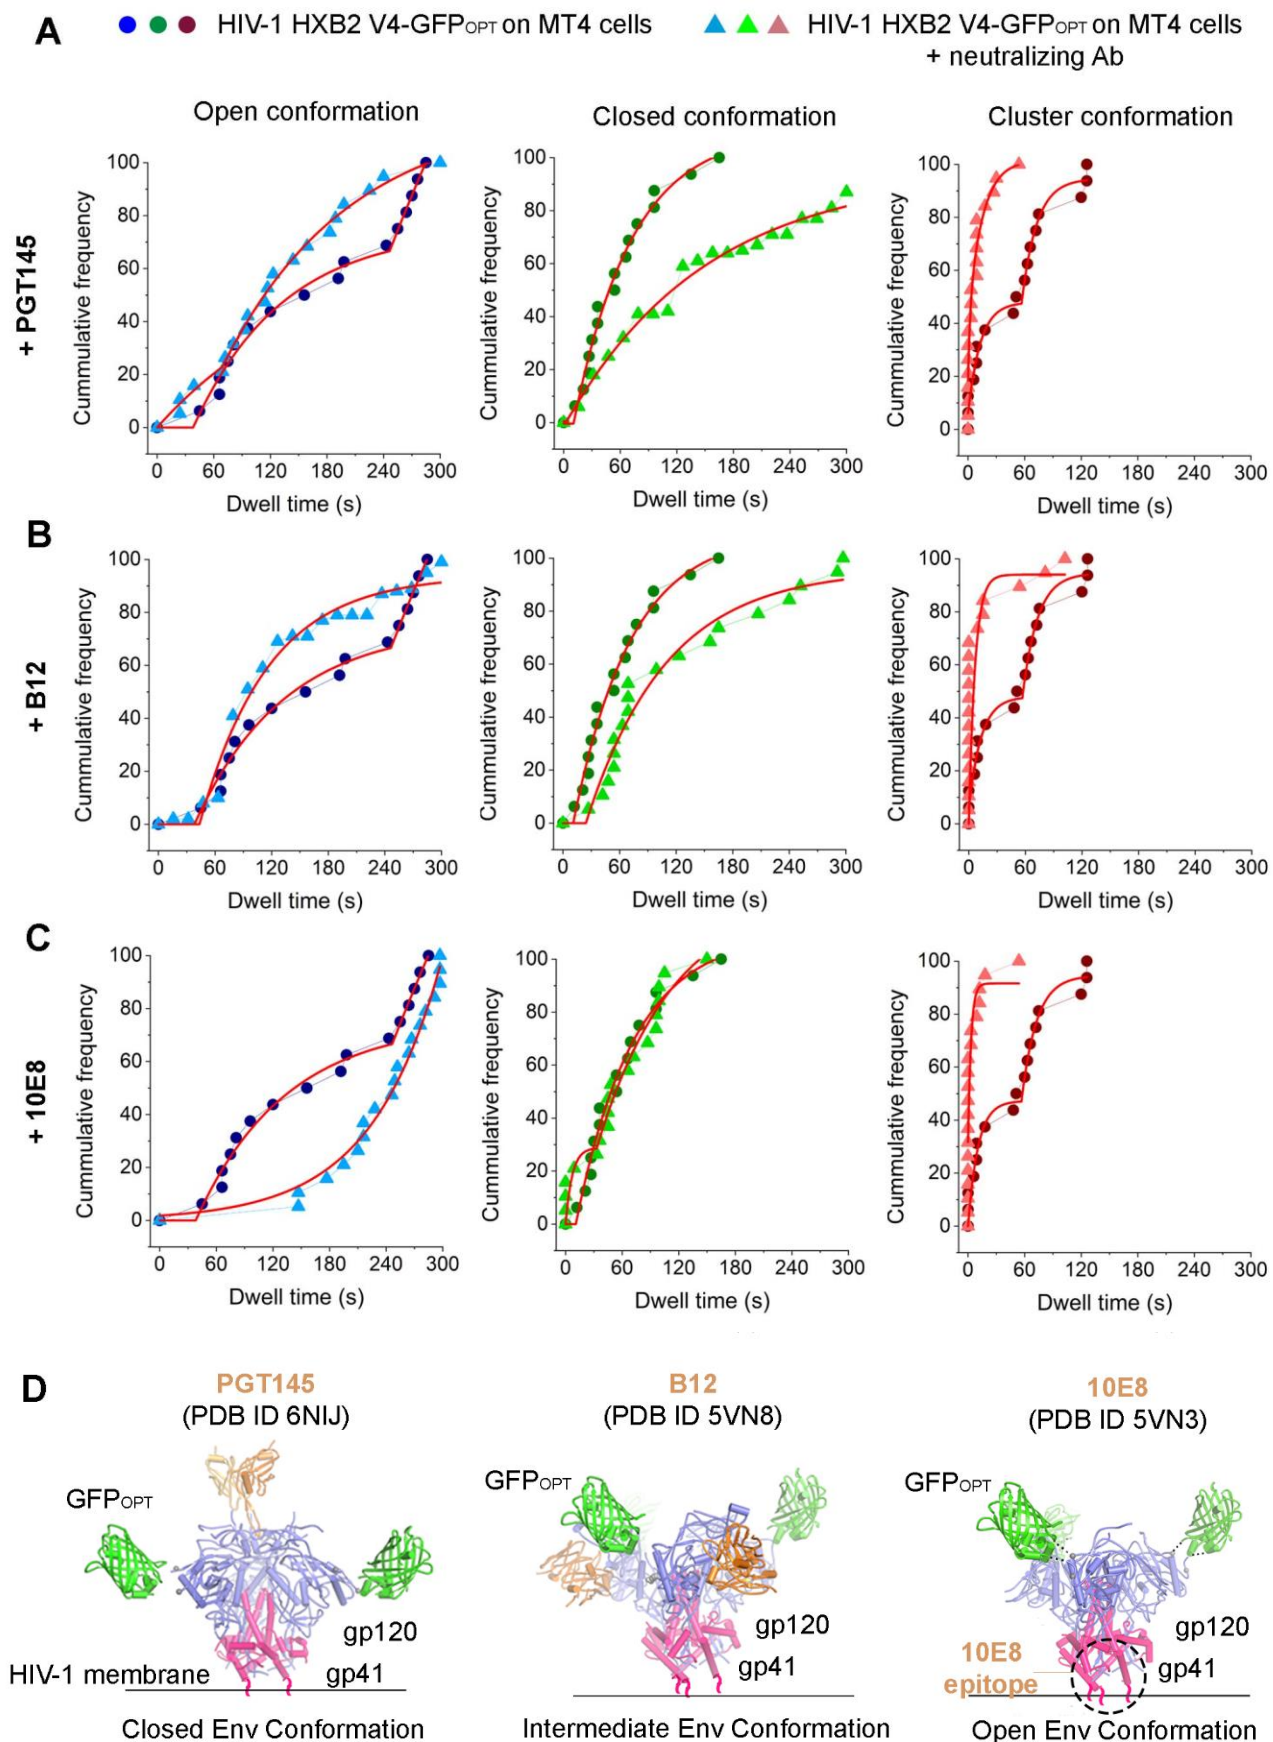

# Fig 7

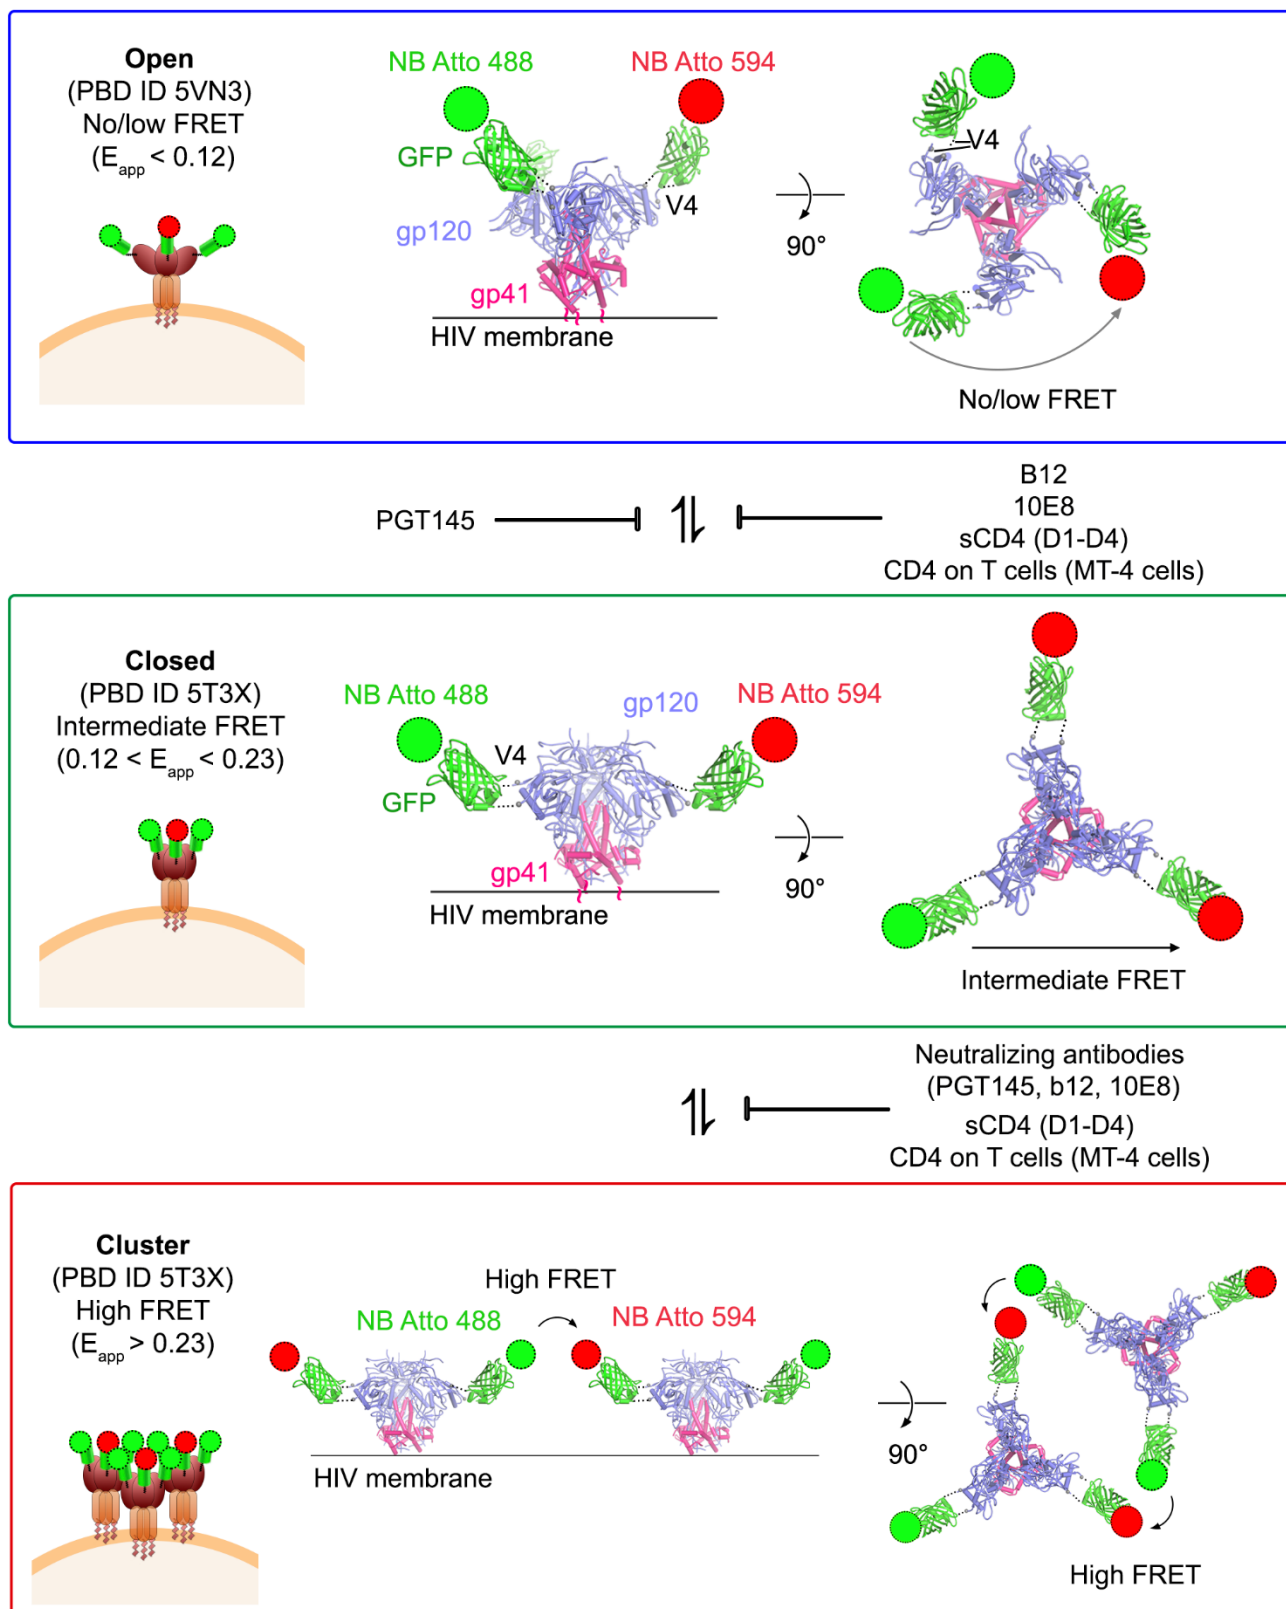

Source: https://www.biorxiv.org/content/10.1101/2020.08.16.252742v1.full.pdf
